1 **A clinical observational analysis of aerosol emissions from dental procedures.**

2 **Authors**

3 T. Dudding<sup>&1,2,3</sup>, S. Sheikh<sup>&4</sup>, F. Gregson<sup>4</sup>, J. Haworth<sup>3,5</sup>, S. Haworth<sup>1,2,3</sup>, B.G. Main<sup>2,3,6</sup>, A.J. Shrimpton<sup>7</sup>,  
4 F.W. Hamilton<sup>1,2,8</sup>, AERATOR group, A.J. Ireland<sup>3,5</sup>, N.A. Maskell<sup>9</sup>, J.P. Reid<sup>4</sup>, B.R. Bzdek<sup>%4</sup>, M.  
5 Gormley<sup>%1,2,3</sup>

6

7 <sup>1</sup> MRC Integrative Epidemiology Unit, Population Health Sciences, Bristol Medical School, University  
8 of Bristol, Bristol, UK.

9 <sup>2</sup> Department of Population Health Sciences, Bristol Medical School, University of Bristol, Bristol, UK.

10 <sup>3</sup> Bristol Dental Hospital and School, University of Bristol, Bristol, UK.

11 <sup>4</sup> School of Chemistry, University of Bristol, Bristol, UK.

12 <sup>5</sup> Royal United Hospital Bath, Combe Park, Bath, UK.

13 <sup>6</sup> Bristol Centre for Surgical Research, Population Health Sciences, Bristol Medical School, Bristol, UK.

14 <sup>7</sup> School of Physiology, Pharmacology & Neuroscience, University of Bristol, Bristol, UK.

15 <sup>8</sup> Infection Sciences, Southmead Hospital, North Bristol NHS Trust, Bristol, UK.

16 <sup>9</sup> Academic Respiratory Unit, University of Bristol, UK.

17 <sup>&</sup> Joint first authors

18 <sup>%</sup> Joint last authors

19

20

21

22

23 Corresponding author: Mark Gormley

24 University of Bristol Dental Hospital and School

25 Lower Maudlin Street

26 Bristol, BS1 2LY

27 Email : [mark.gormley@bristol.ac.uk](mailto:mark.gormley@bristol.ac.uk)

28 Tel: +44(0) 117 33 10097

29

30 **Word count:** 3,143 (excluding abstracts, acknowledgments, figure legends and references)

31 **Reference count:** 25

32 **Figure/table count:** 5

33

34 **Keywords:** COVID-19; Coronavirus; Dental public health; Epidemiology; Ultrasonics; Restorative  
35 dentistry

36

37

38

39

40

41

42

43

44 **Abstract**

45 Aerosol generating procedures (AGPs) are defined as any procedure releasing airborne particles <5  
46  $\mu\text{m}$  in size from the respiratory tract. There remains uncertainty about which dental procedures  
47 constitute AGPs. We quantified the aerosol concentration generated during a range of periodontal,  
48 oral surgery and orthodontic procedures using an aerodynamic particle sizer, which measures the  
49 total concentration and size distribution across the 0.5–20  $\mu\text{m}$  diameter size range. Measurements  
50 were conducted in an environment with a sufficiently low background to detect a patient’s cough,  
51 enabling confident identification of aerosol. Phantom head control experiments for each procedure  
52 were performed under the same conditions as a comparison. Where aerosol was detected during a  
53 patient procedure, we assessed whether the size distribution could be explained by the non-salivary  
54 contaminated instrument source in the respective phantom head control procedure, using a two-  
55 sided unpaired t-test (comparing the mode widths ( $\log(\sigma)$ ) and peak positions ( $D_{p,c}$ )). The aerosol  
56 size distribution provided a robust fingerprint, describing aerosol emission from a source. 41  
57 patients underwent fifteen different dental procedures. For nine of these, no aerosol was detected  
58 above background. Where aerosol was detected, the percentage of procedure time that aerosol was  
59 observed above background ranged from 12.7% for ultrasonic scaling, to 42.9% for 3-in-1 air + water  
60 syringe. For ultrasonic scaling, 3-in-1 syringe use and surgical drilling, the aerosol size distribution  
61 matched the non-salivary contaminated instrument source, with no unexplained aerosol. High and  
62 slow speed drilling produced aerosol from patient procedures with different size distributions to  
63 those measured from the phantom head controls (mode widths  $\log(\sigma)$ ) and peaks ( $D_{p,c}$ )  $p < 0.002$   
64 and therefore, may pose a greater risk of salivary contamination. This study provides evidence for  
65 sources of aerosol generation during common dental procedures, enabling more informed  
66 evaluation of risk and appropriate mitigation strategies.

67

68

69

## 70 **Introduction**

71 Transmission of respiratory diseases, such as severe acute respiratory syndrome coronavirus 2  
72 (SARS-CoV-2), the causative virus for the coronavirus disease 2019 (COVID-19), can occur through  
73 direct or indirect physical contact, droplet inhalation or airborne transmission (World Health  
74 Organization 2020). Aerosols and droplets are created when the surface tension of a fluid is  
75 overcome by force, for example from air turbines within dental drills (Wilson et al. 2020). High viral  
76 loads present in the course of COVID-19 infection make dental aerosols a plausible source of  
77 infective particles (Jeong et al. 2020; Wilson et al. 2020; Zhu et al. 2020). A recent study has  
78 demonstrated that asymptomatic patients attending dental care settings can be positive for SARS-  
79 CoV-2 (Conway et al. 2021). Understanding and managing the disease risk posed by dental aerosols  
80 is important to protect patients and dental teams.

81

82 Aerosol generating procedures (AGPs) may result in respiratory disease transmission, and are  
83 defined as any procedure that can result in the release of airborne particles  $<5 \mu\text{m}$  in size from the  
84 respiratory tract of an individual (Public Health England 2020). Recent work has shown that dental  
85 AGPs generate particles with a size distribution sufficiently wide to potentially incorporate SARS-  
86 CoV-2 virions ( $0.05\text{--}0.15 \mu\text{m}$ ) (Ehtezazi et al. 2021). Aerosol generated during dental procedures is of  
87 respirable size, can remain suspended in air around the dental team (Szymańska 2007), and is  
88 removed primarily by ventilation parameters of the room. By contrast, larger splatter particles ( $>50$   
89  $\mu\text{m}$ ), often follow a ballistic trajectory, and are rarely detected more than 2 m from the source  
90 during dental procedures (Shahdad et al. 2020).

91

92 Potential AGPs have attracted additional mandatory infection control practices, including personal  
93 protective equipment (PPE), ensuring adequate ventilation and allowing additional ‘fallow’ time

94 between patients to enhance aerosol dispersion (Public Health England 2021). In dentistry there  
95 remains uncertainty about which procedures constitute an AGP, with a recent systematic review  
96 highlighting this evidence gap (Innes et al. 2021). Previous studies suffer from inherent drawbacks,  
97 using instruments with limited sensitivity to accurately detect aerosol, such as culture or settling  
98 plates, which do not account for the suspension of particles or those removed through ventilation  
99 (Dawson et al. 2016; Harrel and Molinari 2004; Leggat and Kedjarune 2001). Others have employed  
100 simulation on phantom heads (Allison et al. 2021; Veena et al. 2015), which may not accurately  
101 capture the real clinical scenario. Some recent studies have used high-resolution electrical low-  
102 pressure impactor particle sizers (Ehtezazi et al. 2021) and portable scanning mobility particle sizers  
103 (Din et al. 2020), to capture the smaller aerosol particles (<10  $\mu\text{m}$ ) likely produced during dental  
104 AGPs. However, this work has also been performed in phantom heads rather than on dental  
105 patients.

106

107 For any dental procedure on a patient, there are three aerosol sources to consider. First, the host  
108 (patient) aerosol generated during breathing, speaking, or coughing may be infectious to the dental  
109 team in close proximity (Fennelly 2020). The second source of aerosol is the instrument generated  
110 aerosol, which is not considered infectious as there is no physical interaction with the host. Finally,  
111 there is salivary-contaminated aerosol generated by the action of the instrument in a potentially  
112 infectious host, which might be infectious. One challenge in aerosol research is separating this  
113 salivary-contaminated aerosol from the non-salivary contaminated instrument source. In this study  
114 we quantified the aerosol number concentration, in the 0.5–20  $\mu\text{m}$  size range, produced during a  
115 wide range of dental procedures in a real-world clinical setting. We also aimed to determine  
116 whether aerosol detected was intrinsically generated from the non-salivary contaminated dental  
117 instrument, or likely to be contaminated using aerosol size distribution analysis and modelling with  
118 phantom head controls. These measurements were conducted in an environment with an aerosol

119 background concentration low enough to reliably detect a patient's cough, allowing robust detection  
120 of any aerosol generated during dental procedures.

121

## 122 **Methods**

### 123 *Ethical approval and patient recruitment*

124 This study obtained ethical approval as part of the AERosolisation And Transmission Of SARS-CoV-2  
125 in Healthcare Settings (AERATOR) study via the Northwest Research Ethics Committee (Ref:  
126 20/NW/0393) and was conducted in accordance with the STROBE guidelines (Strengthening the  
127 Reporting of Observational Studies in Epidemiology). Adult patients >18 years old on waiting lists  
128 requiring either periodontal, oral surgery or orthodontic treatment were recruited consecutively.  
129 Each patient was contacted via telephone, received an information leaflet via post, and provided  
130 written consent on the day of treatment.

131

### 132 *Environment and equipment*

133 An Aerodynamic Particle Sizer (APS) (TSI Incorporated, model 3321, Shoreview, NM, USA; detection  
134 range: 0.5-20  $\mu\text{m}$  diameter particles) was used to measure aerosol. A custom 3D-printed funnel  
135 (RAISE3D Pro2 Printer, 3DGBIRE, Chorley, UK) made from polylactide, with a maximum diameter of  
136 150 mm, cone height of 90 mm and a 10 mm exit port, was attached to the APS inlet using  
137 conductive silicone sampling tubing (TSI, 3001788), approximately 0.90 m long and 4.80 mm in  
138 diameter. The experimental set-up is shown in **Supplementary Fig. 1**. The APS was set to sample  
139 aerosol number concentration once per second. Further detail on the environment and instruments  
140 used can be found in the **Supplemental Material**.

141

### 142 *Baseline patient measurements*

143 Baseline readings were taken from each participant including tidal breathing at rest (60 s), counting  
144 out loud (60 s) and three voluntary coughs. The funnel was positioned at source (as close to the  
145 mouth as possible), with the patient seated upright (Gregson et al. 2021). Baseline characteristics of  
146 patients were reported using median and range for continuous data, alongside counts and  
147 percentages for categorical data, stratified by specialty type. To assess for differences between  
148 specialties age and sex distribution was compared using one-way ANOVA and Fisher’s exact test  
149 respectively.

150

#### 151 *Patient dental procedure aerosol measurement*

152 We conducted an initial pilot study to investigate the optimum position and orientation for the 3D-  
153 printed funnel when sampling dental aerosol. This was determined to be 22 cm from soft tissue  
154 nasion to the top of the funnel, at approximately 45 degrees on the patient’s left side (11 o’clock  
155 position). For every case, a full mouth examination was carried out using a dental mirror, followed  
156 by local anaesthetic administration when indicated. Each patient received 3-in-1 syringe air drying  
157 (30 s), water (30 s) and then combined air and water (30 s) applied to their all their teeth. When  
158 necessary, up to 3-minute intervals between procedural steps were allowed for background reading  
159 levels to stabilise. The remainder of the treatment session was dictated by clinical need. A detailed  
160 description of the treatments and time-stamped protocols are provided in the **Supplementary**

#### 161 **Methods.**

162

#### 163 *Phantom head control procedure aerosol measurement*

164 To measure aerosol generated by the dental instruments alone, we conducted high fidelity control  
165 experiments in triplicate, in a phantom head unit. For phantom head control data, the aerosol  
166 number concentration and size distribution were extracted for further analysis. Further detail can be  
167 found in the **Supplementary Methods.**

168

## 169 **Statistical analysis**

### 170 *Total procedure aerosol number concentration*

171 The aerosol number concentration for each procedure and baseline measurement were compared  
172 by calculating particle number concentration detected above background for each patient  
173 (irrespective of particle size). As the length of procedure differed across patients, we sampled the  
174 mean particle number concentration across the sampling time for each patient and the per patient  
175 values were combined to give median and inter-quartile ranges of total aerosol number  
176 concentration for each procedure.

177

### 178 *Procedure aerosol size distributions*

179 The aerosol size distributions from the phantom head control and patients were compared, with the  
180 assumption that if the distributions were the same, all aerosol detected from the patient during the  
181 procedure could be explained by the non-salivary contaminated instrument source (represented by  
182 the phantom control). For each procedure, mean aerosol number concentrations (dN) for a range of  
183 particle size bins ( $D_p$ ) were calculated by averaging across patients. These were transformed  
184 ( $dN/d\text{Log}(D_p)/\text{cm}^{-3}$ ) in order to normalise the data, enabling visual comparison of the size  
185 distribution in a standardised form typical for reporting aerosol size distributions (**Fig. 1**). For each  
186 procedure, the shape of the phantom head control and patient size distributions were compared  
187 visually.

188



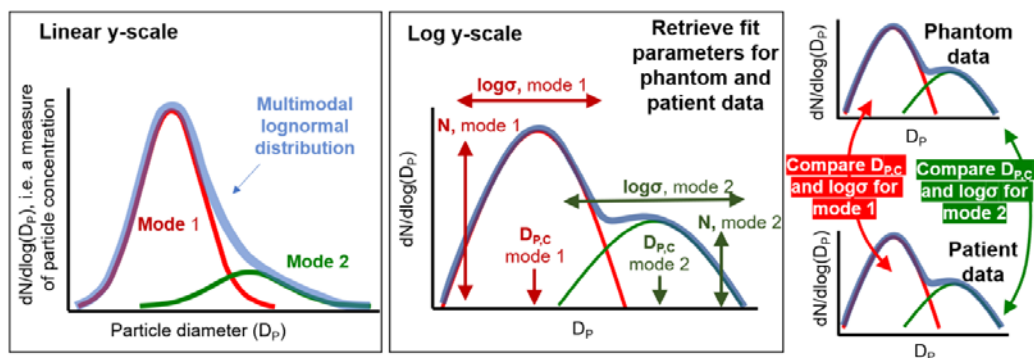

189

190 **Figure 1.** Description of the parameters used to describe the average size distribution detected

191 above background. The mode width is described by log sigma and the peak of the mode by  $D_{p,c}$ .

192 Mode amplitude parameter (N) was not compared, as it is highly dependent on sampling variability.

193

194 The model best describing the size distribution (highest  $r^2$ ) was identified by iteratively altering the

195 number of modes (uni-modal, bi-modal, or tri-modal) using **Supplementary Equation S1**. Once

196 fitted, mode parameters (N,  $D_{p,c}$ , log sigma) were compared between patient and phantom head

197 control as illustrated in **Fig. 1**. To further assess if size distributions between the phantom head

198 control and patient differed other than by chance, a two-sided unpaired t-test was used to compare

199 the mode widths (log sigma) and peak positions ( $D_{p,c}$ ). The mode amplitude parameter (N) was not

200 compared as it is highly dependent on variabilities in sampling efficiency, for example direction of

201 the exhaled airflow, which is not comparable across phantom head and patient sampling. After

202 accounting for multiple parameters compared across instruments (n= 26), a Bonferroni adjusted p-

203 value of 0.002 was used.

204

## 205 Results

206 Forty-one patients were included in the study with a median age of 47 years (range: 18–75)

207 (**Supplementary Tables 1 & 2**). The mean background concentration across patients was 0.18 (+/- SD

208 0.12) and the mean concentration for the two modes was 0.18 (+/- SD 0.12) and 0.18 (+/- SD 0.12).

209 periodontal, orthodontic, and oral surgery treatments. Of these, examination with a dental probe,  
210 hand scaling, local anaesthetic delivery, routine extraction (with forceps and/or elevator), raising a  
211 soft tissue flap, orthodontic bracket removal, alginate impression taking, 3-in-1 water only, and  
212 suturing did not produce any aerosol (**Supplementary Table 3**). For the other six procedures where  
213 aerosol was detected, the percentage of total procedure time that aerosol was observed was 12.7%  
214 for ultrasonic scaling, 24.8% for 3-in-1 air only, 75.3% for 3-in-1 air + water, 40.1% for high-speed  
215 drilling, 49.9% for slow speed drilling and 55.6% for surgical drilling (**Table 1**).

216

217 **Table 1.** Dental procedures for which aerosol was detected above background.

| Procedure           | Number of patients* | Total sampling time for procedure (s) | Time aerosol detected above background (s) | Percentage time aerosol detected above background (%) |
|---------------------|---------------------|---------------------------------------|--------------------------------------------|-------------------------------------------------------|
| Ultrasonic scaling  | 12                  | 12,272                                | 1,559                                      | 12.7                                                  |
| 3-in-1 air only     | 35                  | 801                                   | 199                                        | 24.8                                                  |
| 3-in-1 air + water  | 33                  | 772                                   | 581                                        | 75.3                                                  |
| High speed drilling | 15                  | 3,849                                 | 1,543                                      | 40.1                                                  |
| Slow speed drilling | 15                  | 3,324                                 | 1,632                                      | 49.9                                                  |
| Surgical drilling   | 9                   | 568                                   | 316                                        | 55.6                                                  |

\* Some procedures were conducted in more than one patient

218

219 *Aerosol number concentrations from dental procedures*

220 The aerosol number concentration for each procedure is shown in **Fig. 2**. Participant breathing and  
221 speaking had similar number concentrations and size distributions to background aerosol, indicating  
222 the background dominated the signal for these activities. High speed drilling produced 10-fold more  
223 aerosol (median 118.38 cm<sup>-3</sup>) compared to the other five procedures (ultrasonic scaling, surgical  
224 drilling, 3-in-1 syringe air/ air + water, and slow speed drilling), which were comparable with median  
225 number concentrations of approximately 10 cm<sup>-3</sup>.

226

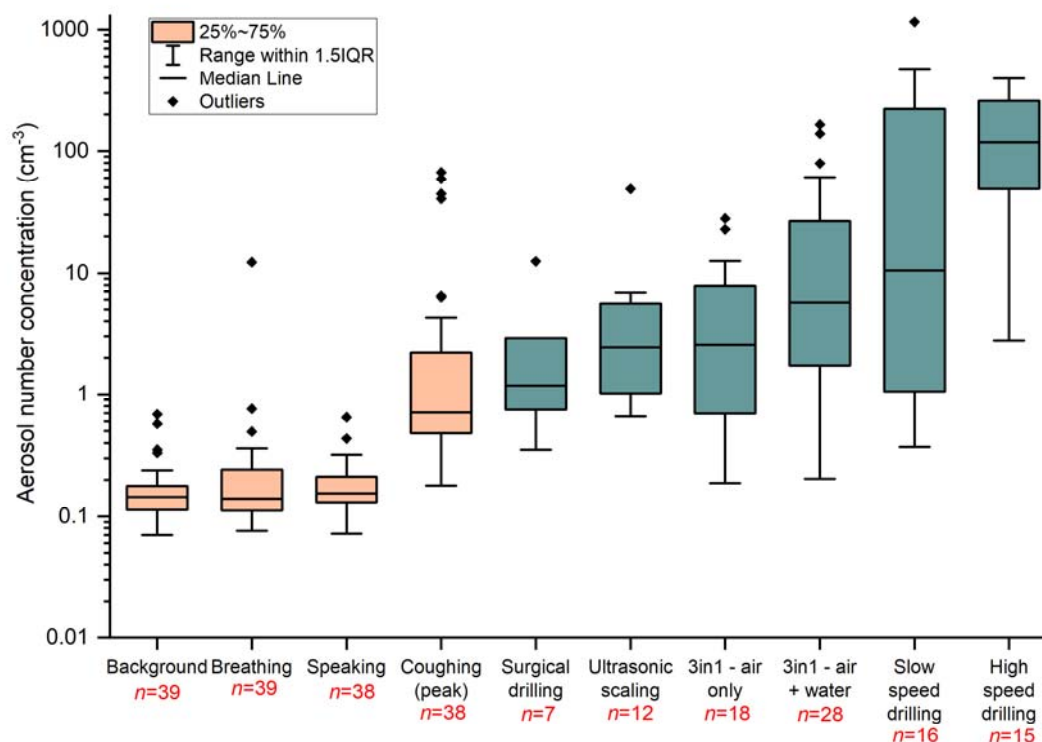

227

228 **Figure 2.** Box and whiskers plot of total aerosol concentration for baseline measurements (orange)  
229 and dental procedures for which aerosol was detected above mean background value (green). The  
230 aerosol number concentration is reported on a logarithmic scale.

231

232 *Aerosol size distributions from dental procedures*

233 Aerosol size distributions inherently provide a robust fingerprint of source. Different aerosol sources  
234 yield different log-normal distributions with different mean sizes and breadths. Therefore, a detailed  
235 analysis and comparison of size distributions from patient procedures and phantom head controls  
236 enables identification of potential sources of salivary aerosol. The aerosol size distributions detected  
237 from patient procedures are shown alongside phantom head controls on a linear scale  
238 (**Supplementary Fig. 2**) and a logarithmic scale (**Supplementary Fig. 3**). Distributions show that,

239 within each procedure, the patient and phantom head have the same number of modes with similar  
240 mode widths (log ) and peaks ( $D_{p,c}$ ) but different mode heights (N). Fitted size distributions for  
241 ultrasonic scaling, 3-in-1 air + water and slow speed drilling are shown in **Fig. 3**, the remaining  
242 procedure fits are presented in **Supplementary Fig. 4**.

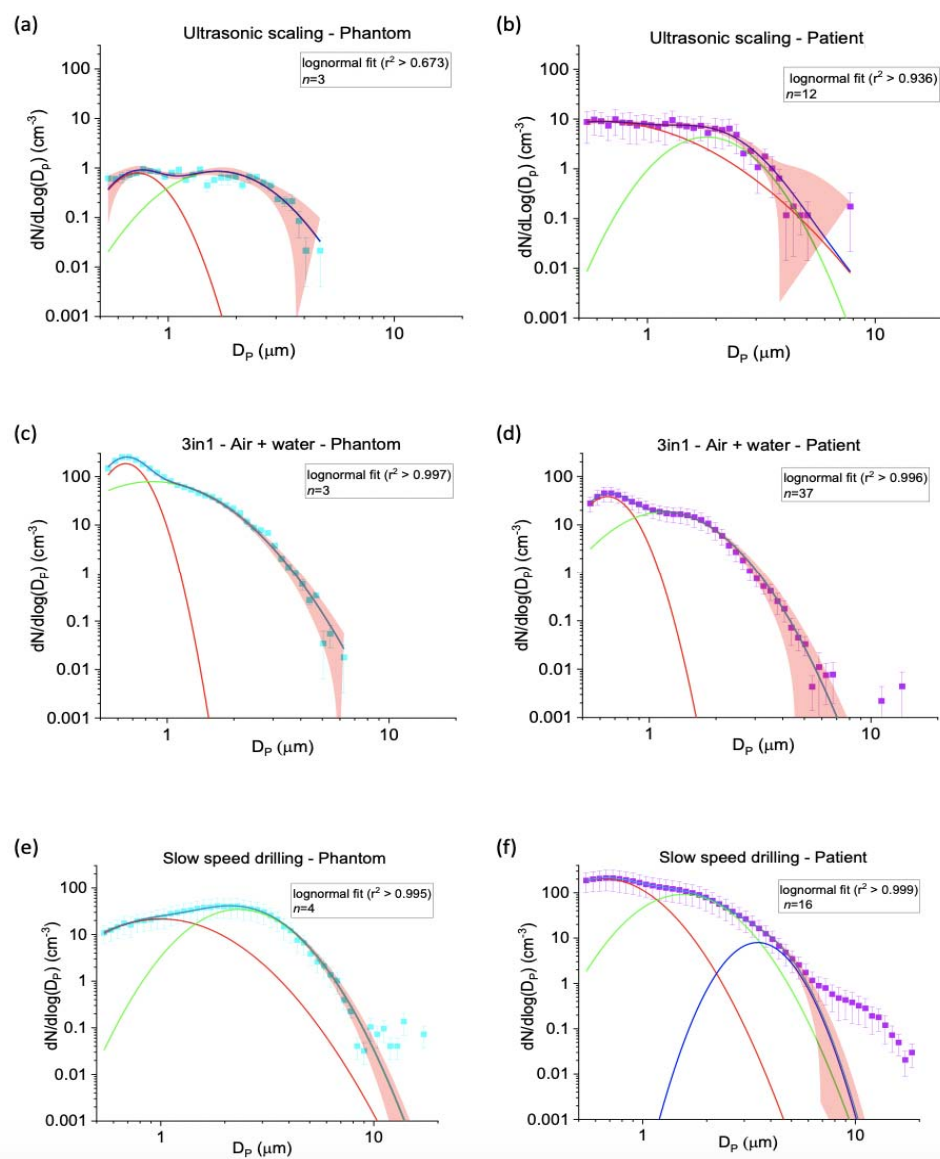

243

244 **Figure 3.** Size distribution data for ultrasonic scaling (a, b), 3-in-1 (c, d) and slow-speed drilling (e, f).

245 Mode 1 (red line), mode 2 (green line), mode 3 (dark blue line) and cumulative bi- or tri-modal fit

246 (blue line). 95% confidence band is shown as the red shaded area.

247

248 **Table 2.** A comparison of aerosol size distribution parameters between the phantom control and  
 249 patient data.

| Procedure                  | Mode | Parameter                   | Phantom                     | Patient            | Difference in      | P-value*              |      |
|----------------------------|------|-----------------------------|-----------------------------|--------------------|--------------------|-----------------------|------|
|                            |      |                             | Mean (95% CI)               | Mean (95% CI)      | means (95% CI)     |                       |      |
| <b>Ultrasonic scaling</b>  | 1    | Log( $\sigma$ )             | 0.10 (0.05, 0.15)           | 0.29 (-0.24, 0.83) | 0.19 (-0.90, 1.29) | 0.74                  |      |
|                            |      | $D_{p,c}$ ( $\mu\text{m}$ ) | 0.73 (0.67, 0.79)           | 0.62 (0.44, 0.80)  | 0.11 (-0.26, 0.48) | 0.57                  |      |
|                            | 2    | Log( $\sigma$ )             | 0.18 (0.11, 0.25)           | 0.15 (-0.02, 0.31) | 0.03 (-0.31, 0.37) | 0.87                  |      |
|                            |      | $D_{p,c}$ ( $\mu\text{m}$ ) | 1.66 (1.41, 1.90)           | 1.82 (1.40, 2.24)  | 0.17 (-0.70, 1.03) | 0.71                  |      |
| <b>Surgical drilling</b>   | 1    | Log( $\sigma$ )             | 0.13 (0.03, 0.23)           | 0.18 (-3.13, 3.49) | 0.05 (-5.18, 5.29) | 0.98                  |      |
|                            |      | $D_{p,c}$ ( $\mu\text{m}$ ) | 0.41 (0.29, 0.53)           | 0.23 (-5.12, 5.58) | 0.18 (-8.28, 8.64) | 0.97                  |      |
|                            | 2    | Log( $\sigma$ )             | 0.14 (0.10, 0.18)           | 0.20 (-0.12, 0.53) | 0.06 (-0.45, 0.58) | 0.81                  |      |
|                            |      | $D_{p,c}$ ( $\mu\text{m}$ ) | 0.78 (0.56, 1.00)           | 0.55 (-1.29, 2.39) | 0.23 (-2.68, 3.15) | 0.88                  |      |
| <b>3-in-1 air + water</b>  | 1    | Log( $\sigma$ )             | 0.08 (0.07, 0.08)           | 0.09 (0.08, 0.09)  | 0.01 (-0.01, 0.03) | 0.34                  |      |
|                            |      | $D_{p,c}$ ( $\mu\text{m}$ ) | 0.65 (0.64, 0.66)           | 0.65 (0.64, 0.65)  | 0.00 (-0.02, 0.02) | 0.74                  |      |
|                            | 2    | Log( $\sigma$ )             | 0.22 (0.19, 0.25)           | 0.18 (0.15, 0.20)  | 0.04 (-0.04, 0.12) | 0.35                  |      |
|                            |      | $D_{p,c}$ ( $\mu\text{m}$ ) | 0.86 (0.70, 1.02)           | 1.16 (1.07, 1.25)  | 0.30 (-0.01, 0.62) | 0.07                  |      |
| <b>3-in-1 air only</b>     | 1    | Log( $\sigma$ )             | 0.15 (0.00, 0.31)           | 0.07 (0.04, 0.11)  | 0.08 (-0.03, 0.20) | 0.16                  |      |
|                            |      | $D_{p,c}$ ( $\mu\text{m}$ ) | 0.52 (0.32, 0.71)           | 0.59 (0.54, 0.65)  | 0.08 (-0.07, 0.23) | 0.32                  |      |
|                            | 2    | Log( $\sigma$ )             | 0.36 (0.00, 0.73)           | 0.28 (0.12, 0.44)  | 0.08 (-0.26, 0.42) | 0.65                  |      |
|                            |      | $D_{p,c}$ ( $\mu\text{m}$ ) | 0.72 (-1.03, 2.48)          | 0.47 (-0.08, 1.03) | 0.25 (-1.17, 1.67) | 0.73                  |      |
| <b>High speed drilling</b> | 1    | Log( $\sigma$ )             | 0.16 (0.15, 0.17)           | 0.12 (0.12, 0.13)  | 0.04 (0.02, 0.05)  | $1.10 \times 10^{-5}$ |      |
|                            |      | $D_{p,c}$ ( $\mu\text{m}$ ) | 0.66 (0.65, 0.67)           | 0.65 (0.65, 0.66)  | 0.01 (-0.01, 0.02) | 0.29                  |      |
|                            | 2    | Log( $\sigma$ )             | 0.19 (0.16, 0.21)           | 0.18 (0.17, 0.20)  | 0.00 (-0.03, 0.04) | 0.86                  |      |
|                            |      | $D_{p,c}$ ( $\mu\text{m}$ ) | 1.68 (1.59, 1.77)           | 1.41 (1.36, 1.47)  | 0.26 (0.12, 0.40)  | $1.81 \times 10^{-3}$ |      |
|                            |      | 3                           | log( $\sigma$ )             | 0.09 (0.03, 0.15)  | 0.07 (-0.10, 0.24) | 0.03 (-0.38, 0.43)    | 0.90 |
|                            |      |                             | $D_{p,c}$ ( $\mu\text{m}$ ) | 4.32 (3.65, 5.00)  | 4.79 (2.92, 6.67)  | 0.47 (-3.97, 4.90)    | 0.84 |
| <b>Slow speed drilling</b> | 1    | Log( $\sigma$ )             | 0.34 (0.27, 0.40)           | 0.17 (0.16, 0.18)  | 0.17 (0.13, 0.20)  | $5.54 \times 10^{-8}$ |      |
|                            |      | $D_{p,c}$ ( $\mu\text{m}$ ) | 1.00 (0.60, 1.40)           | 0.65 (0.64, 0.67)  | 0.35 (0.16, 0.53)  | $1.65 \times 10^{-3}$ |      |
|                            | 2    | Log( $\sigma$ )             | 0.19 (0.16, 0.22)           | 0.16 (0.14, 0.18)  | 0.03 (-0.01, 0.07) | 0.22                  |      |
|                            |      | $D_{p,c}$ ( $\mu\text{m}$ ) | 2.11 (2.01, 2.20)           | 1.55 (1.48, 1.63)  | 0.56 (0.40, 0.72)  | $1.89 \times 10^{-6}$ |      |
|                            |      | 3                           | Log( $\sigma$ )             |                    | 0.11 (0.08, 0.14)  |                       |      |
|                            |      |                             | $D_{p,c}$ ( $\mu\text{m}$ ) |                    | 3.48 (3.09, 3.86)  |                       |      |

P<0.002 is the Bonferroni adjusted equivalent of p<0.05

250

251 We assessed how aerosol size distributions from patients may differ from the phantom head control  
 252 for the same procedure. Such assessment enables identification of sources of salivary aerosol,  
 253 relative to the non-salivary aerosol generated by the dental instrument. For ultrasonic scaling, bi-  
 254 modal fits to the patient and phantom head control data show a high level of agreement for the  
 255 mode width (log( $\sigma$ )) (Mode 1:  $p= 0.74$ ; Mode 2  $p= 0.87$ ) and peak ( $D_{p,c}$ ) (Mode 1:  $p= 0.57$ ; Mode 2:  $p=$   
 256  $0.71$ ) between both patient and phantom head control (**Fig. 3a,b** and **Table 2**). This indicates that

257 the phantom head control data (instrument source) may account for all the aerosol seen during  
258 ultrasonic patient procedures. Similarly, data from surgical drilling, 3-in-1 air + water and air alone  
259 could be represented by bi-modal fits, with shape of size distribution curves similar for both the  
260 patient and phantom head controls. Model parameters were similar again, suggesting the aerosol  
261 detected arose from the dental instrument source (**Fig. 3c,d, Supplementary Fig. 4a-d, Table 2**).

262

263 For high-speed drilling, both the phantom head control and patient data fit can be represented by a  
264 tri-modal fit, with similar shaped size distribution curves (**Supplementary Fig. 4e,f**). There was  
265 statistical evidence passing the multiple testing threshold, that the size distribution modes were  
266 different between the phantom head control and the patients ( $\log(\sigma)$ ) (Mode 1:  $p=1.10 \times 10^{-5}$ ) and  
267 peak ( $D_{p,c}$ ) (Mode 2:  $p=1.81 \times 10^{-3}$ ), suggesting the patient aerosol size distribution may not be  
268 completely explained by instrument aerosol (**Table 2**). Slow speed drilling phantom head control  
269 data were best represented by a bi-modal fit, whereas three modes were required for the patient  
270 data. These aerosol size distributions are different from each other, with clear divergence below 3  
271  $\mu\text{m}$  and above 7  $\mu\text{m}$  particle sizes (**Fig. 3e,f**). This difference in size distributions was reinforced as  
272 the parameters showed strong evidence for a difference in Mode 1 (mean difference  $\log(\sigma) = 0.17$   
273 (95% confidence intervals (95%CI), 0.13, 0.20),  $p=5.54 \times 10^{-8}$ ;  $D_{p,c} = 0.35$  (95%CI 0.16, 0.53),  $p=1.65 \times$   
274  $10^{-3}$ ) and Mode 2 (mean difference  $\log(\sigma) = 0.03$  (95%CI -0.01, 0.07),  $p=0.22$ ;  $D_{p,c} = 0.56$  (95%CI 0.40,  
275 0.72),  $p=1.89 \times 10^{-6}$ ) (**Table 2**). Therefore, for slow speed drilling the phantom head control data do  
276 not fully explain what was observed during patient procedures.

277

## 278 Discussion

279 In this study analysing aerosol generation during fifteen different dental procedures at source (as  
280 close to the patient as possible), only six procedures generated aerosol detectable above  
281 background. Our background particle concentration was very low ( $0.18 \text{ cm}^{-3}$ ), and of similar

282 magnitude to that generated during a person speaking but less than that produced by a person  
283 coughing, enabling us to detect confidently aerosol generated from dental procedures. For the six  
284 procedures that did generate detectable aerosol, the size distributions seen in patients closely  
285 matched those observed in phantom head controls for four of them: ultrasonic scaling, 3-in-1 air/ air  
286 + water and surgical drilling. Therefore, we did not detect additional aerosol beyond that generated  
287 by the instrument source alone, which is a non-contaminated source. Consequently, it is unlikely this  
288 aerosol is contaminated by patient biological material, unless new aerosol is generated at a  
289 concentration low enough not to be resolved from the instrument-generated aerosol. We  
290 considered that any process of aerosol impaction, or resuspension within the mouth (thereby  
291 contaminating the aerosol), would have altered the observed size distribution. Aerosol coalescence  
292 rates within the plume would be too small to be significant, altering the number concentration by  
293 <0.1% (see **Supplemental Information**).

294

295 With both high and slow speed drilling, there were differences observed between the phantom head  
296 and patient aerosol size distributions, with the presence of this unexplained aerosol suggesting the  
297 generation of salivary aerosol and consequently the potential for viral transmission. Our study in  
298 patients supports findings from phantom head studies. Din et al. (2021), showed that orthodontic  
299 debonding using a high speed drill led to the most significant increase in particles, while combined  
300 use of the 3-in-1 air-water syringe did not result in any detectable increase in the aerosol levels.  
301 Similarly, Allison et al. (2021) and an N-of-one human volunteer study (Yang et al. 2021) found that  
302 ultrasonic scaling produces mainly instrument generated aerosol. Similar to these groups, we found  
303 the quantity of ultrasonic aerosol produced was low in comparison to high speed drilling (at least 10  
304 times less) and intermittent, with no detectable aerosol for the majority of the time the instrument  
305 was in use. This may reflect the non-continuous use of dental instruments, that aerosol does not  
306 always escape the oral cavity, is mitigated by use of high-volume suction, or that there is  
307 directionality to the aerosol plume generated, which cannot be continuously sampled.

308

309 Our study characterises aerosol generation during dental procedures, but did not test for the  
310 presence of SARS-CoV-2, although aerosols and droplets are the vehicles that transmit SARS-CoV-2.  
311 Observation of increased aerosol generation does not confirm the potential for pathogen  
312 transmission, and it is possible we may not have been able to identify potential salivary aerosol if the  
313 patient size distribution were altered minimally from the phantom control or of such low  
314 concentration they could not be detected by our instruments. While some air sampling studies have  
315 detected viable SARS-CoV-2, others have not, and this remains technically challenging (Borges et al.  
316 2021; Greenhalgh et al. 2021; Meethil et al. 2021). The use of time-of-flight mass spectrometry  
317 (MALDI-TOF), fluorescein dye or salivary enzyme markers could be useful in determining if  
318 unexplained aerosol contains biological material from the patient. For instrument generated aerosol  
319 to increase the potential risk of SARS-CoV-2 transmission, it must interact with saliva containing the  
320 virus, be of a size distribution that can contain the SARS-CoV-2 particle, withstand irrigant dilution,  
321 and ultimately go on to interact with a susceptible host, all of which makes infection from dental  
322 procedures unlikely.

323

324 In this work, the background aerosol level was low for a typical dental surgery ( $0.18 \text{ cm}^{-3}$ ), but still 50  
325 times higher than can be achieved in a laminar flow theatre setting (Brown et al. 2021). It is possible  
326 therefore that very low levels of aerosol (e.g., from breathing or speaking) may have gone  
327 undetected (Gregson et al. 2021). Nonetheless, we accurately measured size distribution profiles to  
328 identify differences in patient data, compared to phantom head controls. Many factors affect the  
329 size distribution including directionality, which are not possible to control for in a clinical setting e.g.,  
330 patient movement or differences in use of instruments by clinicians. While the intensity of aerosol  
331 may reduce with movement, size distributions will be unaffected. Furthermore, we appreciate the  
332 phantom head control procedures were not completely comparable to patient procedures, however  
333 given the data appear very similar in both, we would expect the phantom to be more similar if



334 matched exactly on tooth or quadrant. Both sets of experiments are comparable, because the set-up  
335 for phantom head controls and patient measurements were the same, including relative humidity  
336 and temperature control.

337

338 While we investigated a wide range of dental procedures, it is not clear if these results can be  
339 extrapolated to the same instrument being used for a different purpose (e.g., cutting a cavity using a  
340 high speed drill), or different instruments performing the same procedure (e.g., piezo surgery  
341 instead of surgical drilling). This study limited itself to aerosols in the 0.5–20 µm diameter size range,  
342 which includes respirable aerosol. The removal of aerosol in this size range is mainly governed by  
343 room ventilation. The studied procedures may generate larger droplets, which tend to behave more  
344 ballistically (Micik et al. 1969). Aerosol smaller than those studied here are less likely to harbour the  
345 virus (Fennelly 2020). Finally, evaporation may occur between aerosol generation at the source and  
346 measurement, which may alter the aerosol size distribution.

347

348 It has been suggested that the use of the term AGP should be reconsidered (Hamilton et al. 2021a).  
349 Coughing for example, which can occur during any dental procedure (**Supplementary Figure 5**),  
350 generates aerosol in orders of magnitude greater than many respiratory procedures that are  
351 designated AGPs, perhaps posing more of a risk (Hamilton et al. 2021b). The potential for viral  
352 transmission, may be determined by the proximity of the dental care professional to the patient,  
353 given the inevitable exposure to short range aerosol and droplet transmission of respiratory aerosol,  
354 rather than by the instrument or procedure. This study provides further evidence for sources of  
355 aerosol generation during common dental procedures, so a more holistic approach to risk  
356 assessment can be considered (Hamilton et al. 2021a).

357

358

359 **Author Contributions**

360 T. Dudding, S. Sheikh, F. Gregson, J. Haworth, S. Haworth, A.J. Ireland, J.P. Reid, B.R. Bzdek and M.  
361 Gormley contributed to conception and study design. T. Dudding, S. Sheikh, J. Haworth, and M.  
362 Gormley were responsible for data acquisition and curation. T. Dudding, S. Sheikh, F. Gregson, and  
363 M. Gormley drafted the initial manuscript and all authors contributed to subsequent drafts. Data  
364 analysis was carried out by T. Dudding, S. Sheikh, F. Gregson, J. Haworth, S. Haworth, J.P. Reid and  
365 B.R. Bzdek. Data interpretation and critical revisions were completed by T. Dudding, S. Sheikh, F.  
366 Gregson, J. Haworth, S. Haworth, B.G. Main, A.J. Shrimpton, F.W. Hamilton, A.J. Ireland, N.A.  
367 Maskell, B.R. Bzdek, J.P. Reid and M. Gormley and all authors helped write the final version of the  
368 manuscript. This study is part of a wider collaboration represented by the AERATOR Group who were  
369 responsible for the grant idea, writing and funding of this work. All authors gave final approval and  
370 agree to be accountable for all aspects of the work.

371

372 **Acknowledgements**

373 Firstly, we would like to thank the patients who volunteered to take part in this study and for  
374 recognising the value of this work. We thank all the management, administrative and clinical staff at  
375 Bristol Dental Hospital and School for their logistical support with this study. In particular Ms Sarah  
376 Bain, Dr Julie Weeks, Ms Sarah Constant, Ms Becki Bullock, Ms Kuldip Bhakerd, Ms Ceit Scott and Mr  
377 James Tubman. We also extend our thanks to the nursing staff and clinicians who assisted with the  
378 patient procedures, including Dr Alex Gormley, Dr Charlotte Richards and the BSc Dental Hygiene  
379 and Therapy students. We would like to thank the Medical Equipment Management Organisation  
380 Clinical Engineering (MEMO) team at University Hospitals Bristol and Weston Foundation Trust, Mr  
381 John Woods (Nuview Ltd.) for sourcing and supplying the Jade SCA5000C Air Purification units  
382 (Surgically Clean Air®, Toronto, Ontario) and Ms Adele Carter, for her assistance with arranging the  
383 phantom head simulation equipment. Finally, we acknowledge the AERATOR Group who helped  
384 write the grant to obtain the funding for this work.

385

386 \*AERATOR Group members who contributed to this work include: Alice Milne, James Murray,  
387 Johannes Keller, Jules Brown, Andrew Shrimpton, Anthony Pickering, Timothy Cook, Mark Gormley,  
388 David Arnold, George Nava, Jonathan Reid, Bryan R Bzdek, Sadiyah Sheikh, Florence Gregson, Fergus  
389 Hamilton, Nick Maskell, James Dodd, Ed Moran.

390

### 391 **Declaration of Conflicting Interests**

392 The authors declared no potential conflicts of interest with respect to the research, authorship,  
393 and/or publication of this article. No corporate funding was received, or any material transfer  
394 agreements made with any company or sponsor.

395

### 396 **Funding**

397 The AERosolisation And Transmission Of SARS-CoV-2 in Healthcare Settings (AERATOR) study was  
398 funded by National Institute of Health Research (NIHR) (Award ID: COV0333) and has been awarded  
399 urgent public health status (IRAS-Number: 288784; CPMS-ID: 47097). T. Dudding and S. Haworth are  
400 supported by NIHR through the Academic Clinical Fellowship scheme. M. Gormley is supported by a  
401 Wellcome Trust GW4-Clinical Academic Training PhD Fellowship. This research was funded in part,  
402 by the Wellcome Trust [Grant number 220530/Z/20/Z]. For the purpose of open access, the author  
403 has applied a CC BY public copyright licence to any Author Accepted Manuscript version arising from  
404 this submission. Bryan R. Bzdek is supported by the Natural Environment Research Council  
405 (NE/P018459/1).

406

407

408

409 **References**

- 410 Allison JR, Currie CC, Edwards DC, Bowes C, Coulter J, Pickering K, Kozhevnikova E, Durham J, Nile CJ,  
411 Jakubovics N et al. 2021. Evaluating aerosol and splatter following dental procedures:  
412 Addressing new challenges for oral health care and rehabilitation. *Journal of Oral*  
413 *Rehabilitation*. 48(1):61-72.
- 414 Borges JT, Nakada LYK, Maniero MG, Guimarães JR. 2021. SARS-CoV-2: a systematic review of indoor  
415 air sampling for virus detection. *Environmental Science and Pollution Research*. 25:1–14.
- 416 Conway DI, Culshaw S, Edwards M, Clark C, Watling C, Robertson C, Braid R, O'Keefe E, McGoldrick  
417 N, Burns J et al. 2021. SARS-CoV-2 Positivity in Asymptomatic-Screened Dental Patients. *J*  
418 *Dent Res*. 100(6):583-590.
- 419 Dawson M, Soro V, Dymock D, Price R, Griffiths H, Dudding T, Sandy JR, Ireland AJ. 2016.  
420 Microbiological assessment of aerosol generated during debond of fixed orthodontic  
421 appliances. *Am J Orthod Dentofacial Orthop*. 150(5):831-838.
- 422 Din AR, Hindocha A, Patel T, Sudarshan S, Cagney N, Koched A, Mueller J-D, Seoudi N, Morgan C,  
423 Shahdad S et al. 2020. Quantitative analysis of particulate matter release during orthodontic  
424 procedures: a pilot study. *British Dental Journal*. [https://doi.org/10.1038/s41415-020-2280-](https://doi.org/10.1038/s41415-020-2280-5)  
425 [5](https://doi.org/10.1038/s41415-020-2280-5).
- 426 Ehtezazi T, Evans DG, Jenkinson ID, Evans PA, Vadgama VJ, Vadgama J, Jarad F, Grey N, Chilcott RP.  
427 2021. SARS-CoV-2: characterisation and mitigation of risks associated with aerosol  
428 generating procedures in dental practices. *Br Dent J*. 1-7.
- 429 Fennelly KP. 2020. Particle sizes of infectious aerosols: implications for infection control. *Lancet*  
430 *Respir Med*. 8(9):914-924.

- 431 Greenhalgh T, Jimenez JL, Prather KA, Tufekci Z, Fisman D, Schooley R. 2021. Ten scientific reasons in  
432 support of airborne transmission of SARS-CoV-2. *Lancet*. 1;397(10285):1603-1605.
- 433 Gregson FKA, Watson NA, Orton CM, Haddrell AE, McCarthy LP, Finnie TJR, Gent N, Donaldson GC,  
434 Shah PL, Calder JD et al. 2021. Comparing aerosol concentrations and particle size  
435 distributions generated by singing, speaking and breathing. *Aerosol Science and Technology*.  
436 55(6):681-691.
- 437 Hamilton F, Arnold D, Bzdek BR, Dodd J, Reid J, Maskell N. 2021a. Aerosol generating procedures:  
438 are they of relevance for transmission of SARS-CoV-2? *Lancet Respir Med*. S2213-  
439 2600(21)00216-2.
- 440 Hamilton F, Gregson F, Arnold D, Sheikh S, Ward K, Brown J, Moran E, White C, Morley A, Bzdek B et  
441 al. 2021b. Aerosol emission from the respiratory tract: an analysis of relative risks from  
442 oxygen delivery systems. *medRxiv*.2021.2001.2029.21250552.
- 443 Harrel SK, Molinari J. 2004. Aerosols and splatter in dentistry: a brief review of the literature and  
444 infection control implications. *J Am Dent Assoc*. 135(4):429-437.
- 445 Innes N, Johnson IG, Al-Yaseen W, Harris R, Jones R, Kc S, McGregor S, Robertson M, Wade WG,  
446 Gallagher JE. 2021. A systematic review of droplet and aerosol generation in dentistry.  
447 *Journal of dentistry*. 105:103556-103556.
- 448 Jeong HW, Kim S-M, Kim H-S, Kim Y-I, Kim JH, Cho JY, Kim S-H, Kang H, Kim S-G, Park S-J et al. 2020.  
449 Viable SARS-CoV-2 in various specimens from COVID-19 patients. *Clinical microbiology and*  
450 *infection : the official publication of the European Society of Clinical Microbiology and*  
451 *Infectious Diseases*. 26(11):1520-1524.
- 452 Leggat PA, Kedjarune U. 2001. Bacterial aerosols in the dental clinic: a review. *Int Dent J*. 51(1):39-  
453 44.

- 454 Meethil AP, Saraswat S, Chaudhary PP, Dabdoub SM, Kumar PS. 2021. Sources of SARS-CoV-2 and  
455 Other Microorganisms in Dental Aerosols. *J Dent Res.* 220345211015948.
- 456 Micik RE, Miller RL, Mazzarella MA, Ryge G. 1969. Studies on dental aerobiology. I. Bacterial aerosols  
457 generated during dental procedures. *J Dent Res.* 48(1):49-56.
- 458 Public Health England. COVID-19: Infection prevention and control dental appendix. 2020. [accessed  
459 2021 May 27].  
460 [https://assets.publishing.service.gov.uk/government/uploads/system/uploads/attachment](https://assets.publishing.service.gov.uk/government/uploads/system/uploads/attachment_data/file/954834/Infection_prevention_and_control_guidance_dental_appendix.pdf)  
461 [data/file/954834/Infection\\_prevention\\_and\\_control\\_guidance\\_dental\\_appendix.pdf](https://assets.publishing.service.gov.uk/government/uploads/system/uploads/attachment_data/file/954834/Infection_prevention_and_control_guidance_dental_appendix.pdf).
- 462 Public Health England. COVID-19: Guidance for maintaining services within health and care settings:  
463 Infection prevention and control recommendations. 2021. [accessed 2021 May 27].  
464 [https://assets.publishing.service.gov.uk/government/uploads/system/uploads/attachment](https://assets.publishing.service.gov.uk/government/uploads/system/uploads/attachment_data/file/954690/Infection_Prevention_and_Control_Guidance_January_2021.pdf)  
465 [data/file/954690/Infection\\_Prevention\\_and\\_Control\\_Guidance\\_January\\_2021.pdf](https://assets.publishing.service.gov.uk/government/uploads/system/uploads/attachment_data/file/954690/Infection_Prevention_and_Control_Guidance_January_2021.pdf).
- 466 Shahdad S, Patel T, Hindocha A, Cagney N, Mueller J-D, Seoudi N, Morgan C, Din A. 2020. The  
467 efficacy of an extraoral scavenging device on reduction of splatter contamination during  
468 dental aerosol generating procedures: an exploratory study. *British Dental Journal.*
- 469 Szymańska J. 2007. Dental bioaerosol as an occupational hazard in a dentist's workplace. *Ann Agric*  
470 *Environ Med.* 14(2):203-207.
- 471 Veena HR, Mahantesha S, Joseph PA, Patil SR, Patil SH. 2015. Dissemination of aerosol and splatter  
472 during ultrasonic scaling: A pilot study. *Journal of Infection and Public Health.* 8(3):260-265.
- 473 Wilson N, Corbett S, Tovey E. 2020. Airborne transmission of covid-19. *BMJ.* 370:m3206.
- 474 World Health Organization. Infection prevention and control during health care when novel  
475 coronavirus (nCoV) infection is suspected. 2020. [accessed 2021 May 27].  
476 <https://www.who.int/publications/i/item/10665-331495>.

- 477 Yang M, Chaghtai A, Melendez M, Hasson H, Whitaker E, Badi M, Sperrazza L, Godel J, Yesilsoy C,  
478 Tellez M et al. 2021. Mitigating saliva aerosol contamination in a dental school clinic. BMC  
479 Oral Health. 21(1):52.
- 480 Zhu J, Guo J, Xu Y, Chen X. 2020. Viral dynamics of SARS-CoV-2 in saliva from infected patients. The  
481 Journal of infection. 81(3):e48-e50.
- 482
