1 **A clinical observational analysis of aerosol emissions from dental procedures.**

2 **Authors**

3 T. Dudding<sup>&1,2,3</sup>, S. Sheikh<sup>&4</sup>, F. Gregson<sup>4</sup>, J. Haworth<sup>3,5</sup>, S. Haworth<sup>1,2,3</sup>, B.G. Main<sup>2,3,6</sup>, A.J. Shrimpton<sup>7</sup>,  
4 F.W. Hamilton<sup>1,2,8</sup>, AERATOR group, A.J. Ireland<sup>3,5</sup>, N.A. Maskell<sup>9</sup>, J.P. Reid<sup>4</sup>, B.R. Bzdek<sup>%4</sup>, M.  
5 Gormley<sup>%1,2,3</sup>

6

7 <sup>1</sup> MRC Integrative Epidemiology Unit, Population Health Sciences, Bristol Medical School, University  
8 of Bristol, Bristol, UK.

9 <sup>2</sup> Department of Population Health Sciences, Bristol Medical School, University of Bristol, Bristol, UK.

10 <sup>3</sup> Bristol Dental Hospital and School, University of Bristol, Bristol, UK.

11 <sup>4</sup> School of Chemistry, University of Bristol, Bristol, UK.

12 <sup>5</sup> Royal United Hospital Bath, Combe Park, Bath, UK.

13 <sup>6</sup> Bristol Centre for Surgical Research, Population Health Sciences, Bristol Medical School, Bristol, UK.

14 <sup>7</sup> School of Physiology, Pharmacology & Neuroscience, University of Bristol, Bristol, UK.

15 <sup>8</sup> Infection Sciences, Southmead Hospital, North Bristol NHS Trust, Bristol, UK.

16 <sup>9</sup> Academic Respiratory Unit, University of Bristol, UK.

17 <sup>&</sup> Joint first authors

18 <sup>%</sup> Joint last authors

19

20

21

22

23 Corresponding author: Mark Gormley

24 University of Bristol Dental Hospital and School

25 Lower Maudlin Street

26 Bristol, BS1 2LY

27 Email : [mark.gormley@bristol.ac.uk](mailto:mark.gormley@bristol.ac.uk)

28 Tel: +44(0) 117 33 10097

29

30 **Word count:** 3,143 (excluding abstracts, acknowledgments, figure legends and references)

31 **Reference count:** 25

32 **Figure/table count:** 5

33

34 **Keywords:** COVID-19; Coronavirus; Dental public health; Epidemiology; Ultrasonics; Restorative

35 dentistry

36

37

38

39

40

41

42

43

44 **Abstract**

45 Aerosol generating procedures (AGPs) are defined as any procedure releasing airborne particles <5  
46  $\mu\text{m}$  in size from the respiratory tract. There remains uncertainty about which dental procedures  
47 constitute AGPs. We quantified the aerosol number concentration generated during a range of  
48 periodontal, oral surgery and orthodontic procedures using an aerodynamic particle sizer, which  
49 measures aerosol number concentrations and size distribution across the 0.5–20  $\mu\text{m}$  diameter size  
50 range. Measurements were conducted in an environment with a sufficiently low background to  
51 detect a patient’s cough, enabling confident identification of aerosol. Phantom head control  
52 experiments for each procedure were performed under the same conditions as a comparison.  
53 Where aerosol was detected during a patient procedure, we assessed whether the size distribution  
54 could be explained by the non-salivary contaminated instrument source in the respective phantom  
55 head control procedure using a two-sided unpaired t-test (comparing the mode widths ( $\log(\sigma)$ ) and  
56 peak positions ( $D_{p,c}$ )). The aerosol size distribution provided a robust fingerprint of aerosol emission  
57 from a source. 41 patients underwent fifteen different dental procedures. For nine procedures, no  
58 aerosol was detected above background. Where aerosol was detected, the percentage of procedure  
59 time that aerosol was observed above background ranged from 12.7% for ultrasonic scaling, to  
60 42.9% for 3-in-1 air + water syringe. For ultrasonic scaling, 3-in-1 syringe use and surgical drilling, the  
61 aerosol size distribution matched the non-salivary contaminated instrument source, with no  
62 unexplained aerosol. High and slow speed drilling produced aerosol from patient procedures with  
63 different size distributions to those measured from the phantom head controls (mode widths  $\log(\sigma)$ )  
64 and peaks ( $D_{p,c}$ ),  $p < 0.002$ ) and, therefore, may pose a greater risk of salivary contamination. This  
65 study provides evidence for sources of aerosol generation during common dental procedures,  
66 enabling more informed evaluation of risk and appropriate mitigation strategies.

67

68

## 69 Introduction

70 Transmission of respiratory diseases, such as severe acute respiratory syndrome coronavirus 2  
71 (SARS-CoV-2), the causative virus for the coronavirus disease 2019 (COVID-19), can occur through  
72 direct or indirect physical contact, droplet inhalation or airborne transmission [1]. Aerosols and  
73 droplets are created when the surface tension of a fluid is overcome by force, for example from air  
74 turbines within dental drills [2]. High viral loads present in the course of COVID-19 infection make  
75 dental aerosols a plausible source of infective particles [2-4]. A recent study has demonstrated that  
76 asymptomatic patients attending dental care settings can be positive for SARS-CoV-2 [5].

77 Understanding and managing the disease risk posed by dental aerosols is important to protect  
78 patients and dental teams.

79

80 Aerosol generating procedures (AGPs) may result in respiratory disease transmission, and are  
81 defined as any procedure that can result in the release of airborne particles  $<5 \mu\text{m}$  in size from the  
82 respiratory tract of an individual [6]. Recent work has shown that dental AGPs generate particles  
83 with a size distribution sufficiently wide to potentially incorporate SARS-CoV-2 virions ( $0.05\text{--}0.15$   
84  $\mu\text{m}$ ) [7]. Aerosol generated during dental procedures is of respirable size, can remain suspended in  
85 air around the dental team [8], and is removed primarily by ventilation parameters of the room. By  
86 contrast, larger splatter particles ( $>50 \mu\text{m}$ ), often follow a ballistic trajectory, and are rarely detected  
87 more than 2 m from the source during dental procedures [9].

88

89 Potential AGPs have attracted additional mandatory infection control practices, including personal  
90 protective equipment (PPE), ensuring adequate ventilation and allowing additional 'fallow' time  
91 between patients to enhance aerosol dispersion [10]. In dentistry there remains uncertainty about  
92 which procedures constitute an AGP, with a recent systematic review highlighting this evidence gap  
93 [11]. Previous studies suffer from inherent drawbacks, using instruments with limited sensitivity to

94 accurately detect aerosol, such as culture or settling plates, which do not account for the suspension  
95 of particles or those removed through ventilation [12-14]. Others have employed simulation on  
96 phantom heads [15, 16], which may not accurately capture the real clinical scenario. Some recent  
97 studies have used high-resolution electrical low-pressure impactor particle sizers [7] and portable  
98 scanning mobility particle sizers [17], to capture the smaller aerosol particles (<10 µm) likely  
99 produced during dental AGPs. However, this work has also been performed in phantom heads rather  
100 than on dental patients.

101

102 For any dental procedure on a patient, there are three aerosol sources to consider. First, the host  
103 (patient) aerosol generated during breathing, speaking, or coughing may be infectious to the dental  
104 team in close proximity [18]. The second source of aerosol is the instrument generated aerosol,  
105 which is not considered infectious as there is no physical interaction with the host. Finally, there is  
106 salivary-contaminated aerosol generated by the action of the instrument in a potentially infectious  
107 host, which might be infectious. One challenge is separating this salivary-contaminated aerosol from  
108 the non-salivary contaminated instrument source. In this study we quantified the aerosol number  
109 concentration, in the 0.5–20 µm size range, produced during a wide range of dental procedures in a  
110 real-world clinical setting. We also aimed to determine whether aerosol detected was intrinsically  
111 generated from the non-salivary contaminated dental instrument, or was likely to be contaminated  
112 using aerosol size distribution analysis and modelling with phantom head controls. These  
113 measurements were conducted in an environment with an aerosol background concentration low  
114 enough to reliably detect a patient’s cough, allowing robust detection of any aerosol generated  
115 during dental procedures [19].

116

## 117 **Methods**

118 *Ethical approval and patient recruitment*

119 This study obtained ethical approval as part of the AERosolisation And Transmission Of SARS-CoV-2  
120 in Healthcare Settings (AERATOR) study via the Northwest Research Ethics Committee (Ref:  
121 20/NW/0393) and was conducted in accordance with the STROBE guidelines (Strengthening the  
122 Reporting of Observational Studies in Epidemiology). Adult patients >18 years old on waiting lists  
123 requiring either periodontal, oral surgery or orthodontic treatment were recruited consecutively.  
124 Each patient was contacted via telephone, received an information leaflet via post, and provided  
125 written consent on the day of treatment.

126

### 127 *Environment and equipment*

128 An Aerodynamic Particle Sizer (APS) (TSI Incorporated, model 3321, Shoreview, NM, USA; detection  
129 range: 0.5-20  $\mu\text{m}$  diameter particles) was used to measure aerosol. A custom 3D-printed funnel  
130 (RAISE3D Pro2 Printer, 3DGBIRE, Chorley, UK) made from polylactide, with a maximum diameter of  
131 150 mm, cone height of 90 mm and a 10 mm exit port, was attached to the APS inlet using  
132 conductive silicone sampling tubing (TSI, 3001788), approximately 0.90 m long and 4.80 mm in  
133 diameter. The experimental set-up is shown in **Supplementary Fig. 1**. The APS was set to sample  
134 aerosol number concentration once per second. Further detail on the environment and instruments  
135 used can be found in the **Supplemental Material**.

136

### 137 *Baseline patient measurements*

138 Baseline readings were taken from each participant including tidal breathing at rest (60 s), counting  
139 out loud (60 s) and three voluntary coughs. The funnel was positioned at source (as close to the  
140 mouth as possible), with the patient seated upright [20]. Baseline characteristics of patients were  
141 reported using median and range for continuous data, alongside counts and percentages for  
142 categorical data, stratified by specialty type. To assess differences among specialties, age and sex  
143 distribution was compared using one-way ANOVA and Fisher's exact test respectively.

144

145 *Patient dental procedure aerosol measurement*

146 We conducted an initial pilot study to investigate the optimum position and orientation for the 3D-  
147 printed funnel when sampling dental aerosol. This was determined to be 22 cm from soft tissue  
148 nasion to the top of the funnel, at approximately 45 degrees on the patient's left side (11 o'clock  
149 position). For every case, a full mouth examination was carried out using a dental mirror, followed  
150 by local anaesthetic administration when indicated. Each patient received 3-in-1 syringe air drying  
151 (30 s), water (30 s) and then combined air and water (30 s) applied to their all their teeth. When  
152 necessary, up to 3-minute intervals between procedural steps were allowed for background reading  
153 levels to stabilise. The remainder of the treatment session was dictated by clinical need. A detailed  
154 description of the treatments and time-stamped protocols are provided in the **Supplementary**  
155 **Methods.**

156

157 *Phantom head control procedure aerosol measurement*

158 To measure aerosol generated by the dental instruments alone, we conducted high fidelity control  
159 experiments in triplicate, in a phantom head unit. For phantom head control data, the aerosol  
160 number concentration and size distribution were extracted for further analysis. Further detail can be  
161 found in the **Supplementary Methods.**

162

163 **Statistical analysis**

164 *Total procedure aerosol number concentration*

165 The aerosol number concentration for each procedure and baseline measurement were compared  
166 by calculating particle number concentration detected above background for each patient  
167 (irrespective of particle size). As the length of procedure differed across patients, we sampled the

168 mean particle number concentration across the sampling time for each patient and the per patient  
169 values were combined to give median and inter-quartile ranges of total aerosol number  
170 concentration for each procedure.

171

### 172 Procedure aerosol size distributions

173 The aerosol size distributions from the phantom head control and patients were compared, with the  
174 assumption that if the distributions were the same, all aerosol detected from the patient during the  
175 procedure could be explained by the non-salivary contaminated instrument source (represented by  
176 the phantom control). For each procedure, mean aerosol number concentrations ( $dN$ ) for a range of  
177 particle size bins ( $D_p$ ) were calculated by averaging across patients. These were transformed  
178 ( $dN/d\log(D_p)/\text{cm}^{-3}$ ) in order to normalise the data, enabling visual comparison of the size  
179 distribution in a standardised form typical for reporting aerosol size distributions (Fig. 1). For each  
180 procedure, the shape of the phantom head control and patient size distributions were compared  
181 visually.

182

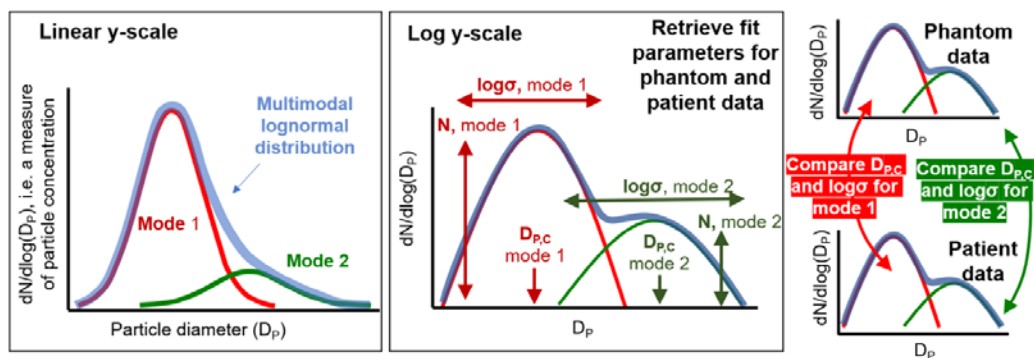

183

184 **Figure 1.** Description of the parameters used to describe the average size distribution detected

185 above background. The mode width is described by  $\log\sigma$  and the peak of the mode by  $D_{p,c}$ .

186 Mode amplitude parameter ( $N$ ) was not compared, as it is highly dependent on sampling variability.



188 In the phantom head control, the model best describing the size distribution (highest  $r^2$ ) was  
189 identified by iteratively altering the number of modes (uni-modal, bi-modal, or tri-modal) using  
190 **Supplementary Equation S1**. Once fitted, mode parameters ( $N$ ,  $D_{p,c}$ ,  $\log(\sigma)$ ) were compared  
191 between patient and phantom head control as illustrated in **Fig. 1**. Aerosol size distributions  
192 inherently provide a robust fingerprint of source with different aerosol sources yielding different log-  
193 normal distributions with different mean sizes and breadths/standard deviations. This enabled us to  
194 attribute aerosols to specific sources e.g., phantom head or patient [21].

195

196 To further assess if size distributions between the phantom head control and patient differed other  
197 than by chance, a two-sided unpaired t-test was used to compare the mode widths ( $\log(\sigma)$ ) and  
198 peak positions ( $D_{p,c}$ ). The mode amplitude parameter ( $N$ ) was not compared as it is highly dependent  
199 on variabilities in sampling efficiency, for example direction of the exhaled airflow, which is not  
200 comparable across phantom head and patient sampling. After accounting for multiple parameters  
201 compared across instruments ( $n=26$ ), a Bonferroni adjusted  $p$ -value of 0.002 was used.

202

## 203 **Results**

204 Forty-one patients were included in the study with a median age of 47 years (range: 18–75)  
205 (**Supplementary Tables 1 & 2**). The mean background aerosol number concentration across patients  
206 was 0.18 (+/- SD 0.12) particles  $\text{cm}^{-3}$  (180 particles per litre). In total, fifteen dental procedures were  
207 assessed during periodontal, orthodontic, and oral surgery treatments. Of these, examination with a  
208 dental probe, hand scaling, local anaesthetic delivery, routine extraction (with forceps and/or  
209 elevator), raising a soft tissue flap, orthodontic bracket removal, alginate impression taking, 3-in-1  
210 water only, and suturing did not produce any aerosol (**Supplementary Table 3**). For the other six  
211 procedures where aerosol was detected, the percentage of total procedure time that aerosol was

212 observed was 12.7% for ultrasonic scaling, 24.8% for 3-in-1 air only, 75.3% for 3-in-1 air + water,  
213 40.1% for high-speed drilling, 49.9% for slow speed drilling and 55.6% for surgical drilling (**Table 1**).

214

215 **Table 1.** Dental procedures for which aerosol was detected above background.

| Procedure           | Number of patients* | Total sampling time for procedure (s) | Time aerosol detected above background (s) | Percentage time aerosol detected above background (%) |
|---------------------|---------------------|---------------------------------------|--------------------------------------------|-------------------------------------------------------|
| Ultrasonic scaling  | 12                  | 12,272                                | 1,559                                      | 12.7                                                  |
| 3-in-1 air only     | 35                  | 801                                   | 199                                        | 24.8                                                  |
| 3-in-1 air + water  | 33                  | 772                                   | 581                                        | 75.3                                                  |
| High speed drilling | 15                  | 3,849                                 | 1,543                                      | 40.1                                                  |
| Slow speed drilling | 15                  | 3,324                                 | 1,632                                      | 49.9                                                  |
| Surgical drilling   | 9                   | 568                                   | 316                                        | 55.6                                                  |

\* Some procedures were conducted in more than one patient

216

217 *Aerosol number concentrations from dental procedures*

218 The aerosol number concentration for each procedure is shown in **Fig. 2**. Participant breathing and  
219 speaking had similar number concentrations and size distributions to background aerosol, indicating  
220 the background dominated the signal for these activities. High speed drilling produced 10-fold more  
221 aerosol (median 118.38 cm<sup>-3</sup>) compared to the other five procedures (ultrasonic scaling, surgical  
222 drilling, 3-in-1 syringe air/ air + water, and slow speed drilling), which were comparable with median  
223 number concentrations of approximately 10 cm<sup>-3</sup>.

224

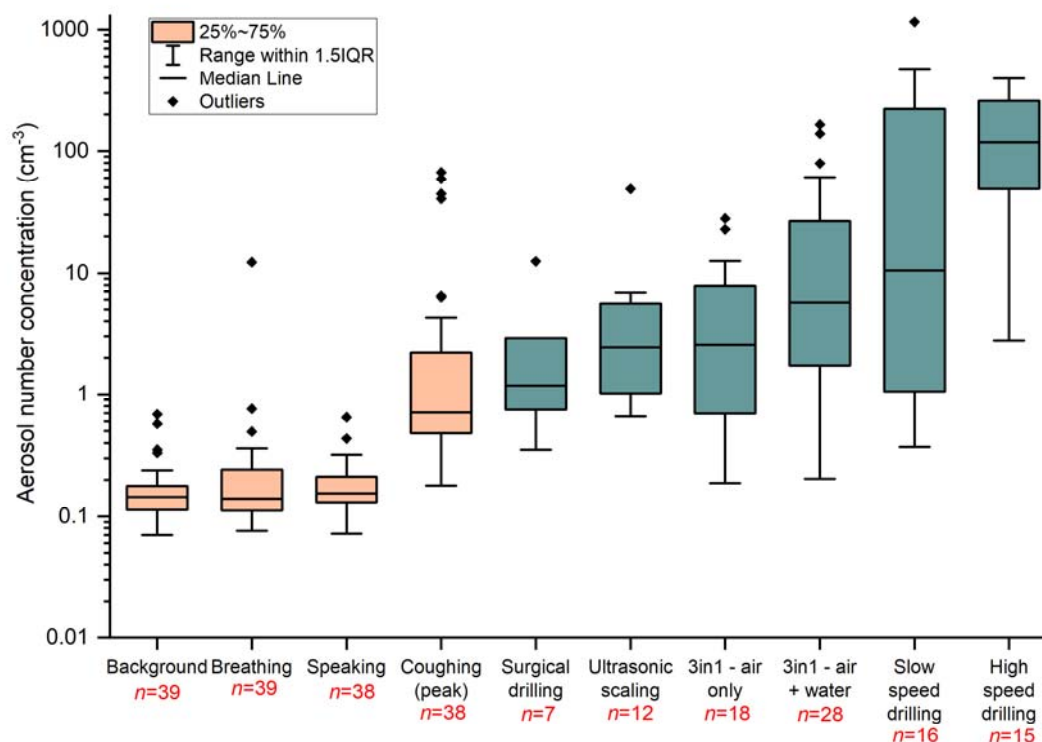

225

226 **Figure 2.** Box and whiskers plot of total aerosol number concentration for baseline measurements  
227 (orange) and dental procedures for which aerosol was detected above mean background value  
228 (green). The aerosol number concentration is reported on a logarithmic scale.

229

### 230 *Aerosol size distributions from dental procedures*

231 Aerosol size distributions inherently provide a robust fingerprint of source. Different aerosol sources  
232 yield different log-normal distributions with different mean sizes and breadths. Therefore, a detailed  
233 analysis and comparison of size distributions from patient procedures and phantom head controls  
234 enables identification of potential sources of salivary aerosol. The aerosol size distributions detected  
235 from patient procedures are shown alongside phantom head controls on a linear scale  
236 (**Supplementary Fig. 2**) and a logarithmic scale (**Supplementary Fig. 3**). Distributions show that,

237 within each procedure, the patient and phantom head have the same number of modes with similar  
238 mode widths (log ) and peaks ( $D_{p,c}$ ) but different mode heights (N). Fitted size distributions for  
239 ultrasonic scaling, 3-in-1 air + water and slow speed drilling are shown in **Fig. 3**, the remaining  
240 procedure fits are presented in **Supplementary Fig. 4**.

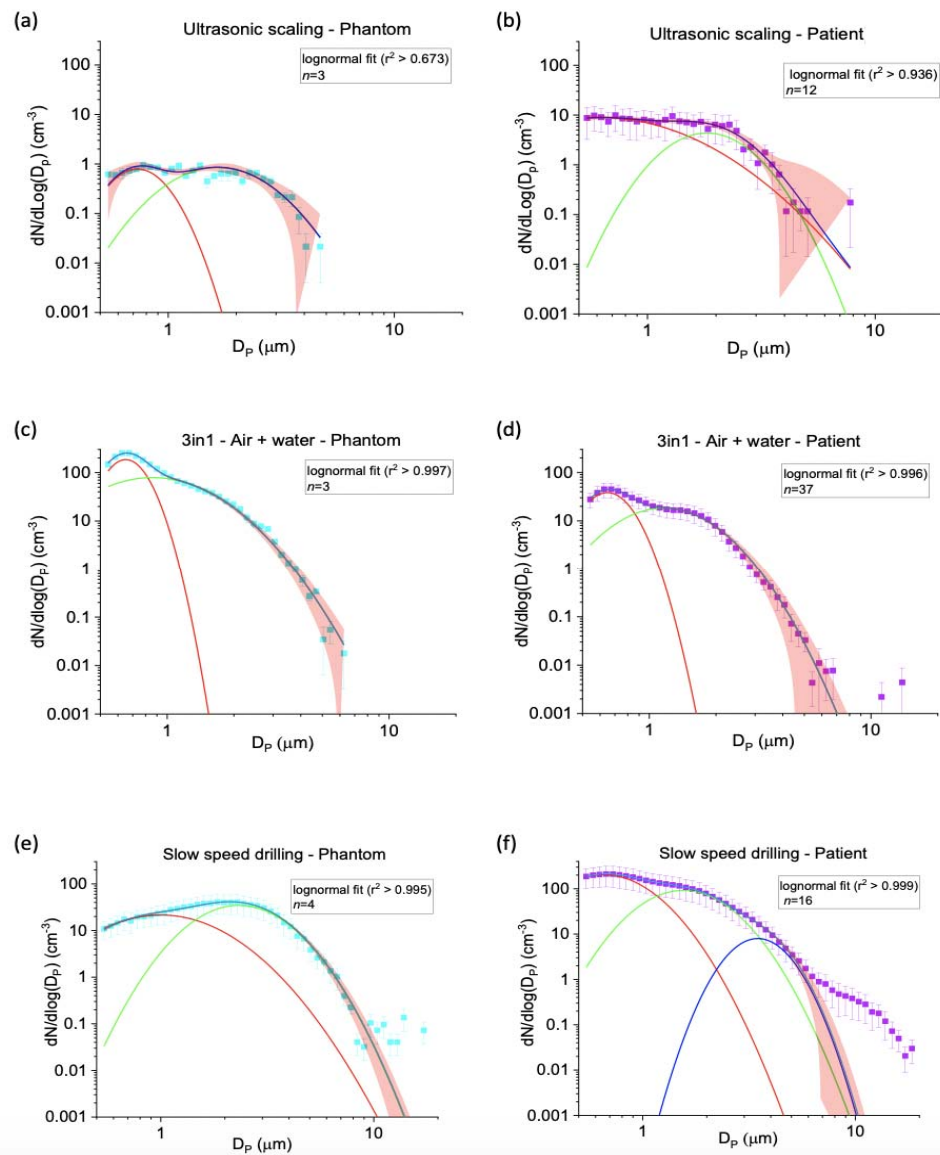

241

242 **Figure 3.** Size distribution data for ultrasonic scaling (a, b), 3-in-1 (c, d) and slow-speed drilling (e, f).

243 Mode 1 (red line), mode 2 (green line), mode 3 (dark blue line) and cumulative bi- or tri-modal fit

244 (blue line). 95% confidence band is shown as the red shaded area.

245

246 **Table 2.** A comparison of aerosol size distribution parameters between the phantom control and  
 247 patient data.

| Procedure                   | Mode | Parameter                   | Phantom<br>Mean (95% CI) | Patient<br>Mean (95% CI) | Difference in<br>means (95% CI) | P-value*              |
|-----------------------------|------|-----------------------------|--------------------------|--------------------------|---------------------------------|-----------------------|
| <b>Ultrasonic scaling</b>   | 1    | Log( $\sigma$ )             | 0.10 (0.05, 0.15)        | 0.29 (-0.24, 0.83)       | 0.19 (-0.90, 1.29)              | 0.74                  |
|                             |      | $D_{p,c}$ ( $\mu\text{m}$ ) | 0.73 (0.67, 0.79)        | 0.62 (0.44, 0.80)        | 0.11 (-0.26, 0.48)              | 0.57                  |
|                             | 2    | Log( $\sigma$ )             | 0.18 (0.11, 0.25)        | 0.15 (-0.02, 0.31)       | 0.03 (-0.31, 0.37)              | 0.87                  |
|                             |      | $D_{p,c}$ ( $\mu\text{m}$ ) | 1.66 (1.41, 1.90)        | 1.82 (1.40, 2.24)        | 0.17 (-0.70, 1.03)              | 0.71                  |
| <b>Surgical drilling</b>    | 1    | Log( $\sigma$ )             | 0.13 (0.03, 0.23)        | 0.18 (-3.13, 3.49)       | 0.05 (-5.18, 5.29)              | 0.98                  |
|                             |      | $D_{p,c}$ ( $\mu\text{m}$ ) | 0.41 (0.29, 0.53)        | 0.23 (-5.12, 5.58)       | 0.18 (-8.28, 8.64)              | 0.97                  |
|                             | 2    | Log( $\sigma$ )             | 0.14 (0.10, 0.18)        | 0.20 (-0.12, 0.53)       | 0.06 (-0.45, 0.58)              | 0.81                  |
|                             |      | $D_{p,c}$ ( $\mu\text{m}$ ) | 0.78 (0.56, 1.00)        | 0.55 (-1.29, 2.39)       | 0.23 (-2.68, 3.15)              | 0.88                  |
| <b>3-in-1 air + water</b>   | 1    | Log( $\sigma$ )             | 0.08 (0.07, 0.08)        | 0.09 (0.08, 0.09)        | 0.01 (-0.01, 0.03)              | 0.34                  |
|                             |      | $D_{p,c}$ ( $\mu\text{m}$ ) | 0.65 (0.64, 0.66)        | 0.65 (0.64, 0.65)        | 0.00 (-0.02, 0.02)              | 0.74                  |
|                             | 2    | Log( $\sigma$ )             | 0.22 (0.19, 0.25)        | 0.18 (0.15, 0.20)        | 0.04 (-0.04, 0.12)              | 0.35                  |
|                             |      | $D_{p,c}$ ( $\mu\text{m}$ ) | 0.86 (0.70, 1.02)        | 1.16 (1.07, 1.25)        | 0.30 (-0.01, 0.62)              | 0.07                  |
| <b>3-in-1 air only</b>      | 1    | Log( $\sigma$ )             | 0.15 (0.00, 0.31)        | 0.07 (0.04, 0.11)        | 0.08 (-0.03, 0.20)              | 0.16                  |
|                             |      | $D_{p,c}$ ( $\mu\text{m}$ ) | 0.52 (0.32, 0.71)        | 0.59 (0.54, 0.65)        | 0.08 (-0.07, 0.23)              | 0.32                  |
|                             | 2    | Log( $\sigma$ )             | 0.36 (0.00, 0.73)        | 0.28 (0.12, 0.44)        | 0.08 (-0.26, 0.42)              | 0.65                  |
|                             |      | $D_{p,c}$ ( $\mu\text{m}$ ) | 0.72 (-1.03, 2.48)       | 0.47 (-0.08, 1.03)       | 0.25 (-1.17, 1.67)              | 0.73                  |
| <b>High speed drilling</b>  | 1    | Log( $\sigma$ )             | 0.16 (0.15, 0.17)        | 0.12 (0.12, 0.13)        | 0.04 (0.02, 0.05)               | $1.10 \times 10^{-5}$ |
|                             |      | $D_{p,c}$ ( $\mu\text{m}$ ) | 0.66 (0.65, 0.67)        | 0.65 (0.65, 0.66)        | 0.01 (-0.01, 0.02)              | 0.29                  |
|                             | 2    | Log( $\sigma$ )             | 0.19 (0.16, 0.21)        | 0.18 (0.17, 0.20)        | 0.00 (-0.03, 0.04)              | 0.86                  |
|                             |      | $D_{p,c}$ ( $\mu\text{m}$ ) | 1.68 (1.59, 1.77)        | 1.41 (1.36, 1.47)        | 0.26 (0.12, 0.40)               | $1.81 \times 10^{-3}$ |
|                             |      | Log( $\sigma$ )             | 0.09 (0.03, 0.15)        | 0.07 (-0.10, 0.24)       | 0.03 (-0.38, 0.43)              | 0.90                  |
|                             |      | $D_{p,c}$ ( $\mu\text{m}$ ) | 4.32 (3.65, 5.00)        | 4.79 (2.92, 6.67)        | 0.47 (-3.97, 4.90)              | 0.84                  |
| <b>Slow speed drilling</b>  | 1    | Log( $\sigma$ )             | 0.34 (0.27, 0.40)        | 0.17 (0.16, 0.18)        | 0.17 (0.13, 0.20)               | $5.54 \times 10^{-8}$ |
|                             |      | $D_{p,c}$ ( $\mu\text{m}$ ) | 1.00 (0.60, 1.40)        | 0.65 (0.64, 0.67)        | 0.35 (0.16, 0.53)               | $1.65 \times 10^{-3}$ |
|                             | 2    | Log( $\sigma$ )             | 0.19 (0.16, 0.22)        | 0.16 (0.14, 0.18)        | 0.03 (-0.01, 0.07)              | 0.22                  |
| $D_{p,c}$ ( $\mu\text{m}$ ) |      | 2.11 (2.01, 2.20)           | 1.55 (1.48, 1.63)        | 0.56 (0.40, 0.72)        | $1.89 \times 10^{-6}$           |                       |
|                             | 3    | Log( $\sigma$ )             |                          | 0.11 (0.08, 0.14)        |                                 |                       |
|                             |      | $D_{p,c}$ ( $\mu\text{m}$ ) |                          | 3.48 (3.09, 3.86)        |                                 |                       |

P<0.002 is the Bonferroni adjusted equivalent of p<0.05

248

249 We assessed how aerosol size distributions from patients may differ from the phantom head control  
 250 for the same procedure. Such assessment enables identification of sources of salivary aerosol,  
 251 relative to the non-salivary aerosol generated by the dental instrument. For ultrasonic scaling, bi-  
 252 modal fits to the patient and phantom head control data show a high level of agreement for the  
 253 mode width (log( $\sigma$ )) (Mode 1:  $p= 0.74$ ; Mode 2  $p= 0.87$ ) and peak ( $D_{p,c}$ ) (Mode 1:  $p= 0.57$ ; Mode 2:  $p=$   
 254  $0.71$ ) between both patient and phantom head control (**Fig. 3a,b** and **Table 2**). This indicates that

255 the phantom head control data (instrument source) may account for all the aerosol seen during  
256 ultrasonic patient procedures. Similarly, data from surgical drilling, 3-in-1 air + water and air alone  
257 could be represented by bi-modal fits, with shape of size distribution curves similar for both the  
258 patient and phantom head controls. Model parameters were similar again, suggesting the aerosol  
259 detected arose from the dental instrument source (**Fig. 3c,d, Supplementary Fig. 4a-d, Table 2**).

260

261 For high-speed drilling, both the phantom head control and patient data fit can be represented by a  
262 tri-modal fit, with similar shaped size distribution curves (**Supplementary Fig. 4e,f**). There was  
263 statistical evidence passing the multiple testing threshold, that the size distribution modes were  
264 different between the phantom head control and the patients ( $\log(\sigma)$ ) (Mode 1:  $p=1.10 \times 10^{-5}$ ) and  
265 peak ( $D_{p,c}$ ) (Mode 2:  $p=1.81 \times 10^{-3}$ ), suggesting the patient aerosol size distribution may not be  
266 completely explained by instrument aerosol (**Table 2**). Slow speed drilling phantom head control  
267 data were best represented by a bi-modal fit, whereas three modes were required for the patient  
268 data. These aerosol size distributions are different from each other, with clear divergence below 3  
269  $\mu\text{m}$  and above 7  $\mu\text{m}$  particle sizes (**Fig. 3e,f**). This difference in size distributions was reinforced as  
270 the parameters showed strong evidence for a difference in Mode 1 (mean difference  $\log(\sigma) = 0.17$   
271 (95% confidence intervals (95%CI), 0.13, 0.20),  $p=5.54 \times 10^{-8}$ ;  $D_{p,c} = 0.35$  (95%CI 0.16, 0.53),  $p=1.65 \times$   
272  $10^{-3}$ ) and Mode 2 (mean difference  $\log(\sigma) = 0.03$  (95%CI -0.01, 0.07),  $p=0.22$ ;  $D_{p,c} = 0.56$  (95%CI 0.40,  
273 0.72),  $p=1.89 \times 10^{-6}$ ) (**Table 2**). Therefore, for slow speed drilling the phantom head control data do  
274 not fully explain what was observed during patient procedures.

275

## 276 Discussion

277 This study explored aerosol generation during fifteen different dental procedures at source (as close  
278 to the patient as possible). Only six procedures generated aerosol detectable above background. Our  
279 background particle concentration was very low ( $0.18 \text{ cm}^{-3}$ ) and of similar magnitude to that

280 generated by a person speaking but less than that generated by a person coughing, enabling  
281 confident detection of aerosol produced during dental procedures.

282

283 Of the six procedures that generated detectable aerosol, the size distributions observed in patients  
284 closely matched those observed in phantom head controls for four of them: ultrasonic scaling, 3-in-1  
285 air/ air + water and surgical drilling. In other words, we did not detect additional aerosol beyond that  
286 generated by the dental instrument alone, which is a non-contaminated source. Dental instrument  
287 aerosol could in principle be contaminated through impaction and resuspension in the mouth or  
288 through coalescence with contaminated aerosol in the oral cavity. However, aerosol coalescence  
289 rates within the dental aerosol plume are too small to be significant. For example, coalescence of 1  
290  $\mu\text{m}$  diameter particles at  $100\text{ cm}^{-3}$  concentration proceeds with a coagulation coefficient equal to  $3.4$   
291  $\times 10^{-16}\text{ m}^3\text{ s}^{-1}$ , reducing the particle concentration to only  $99.999\text{ cm}^{-3}$  in 100 s. Even for coalescence  
292 of dissimilar size particles (e.g., 100 nm particles with 1  $\mu\text{m}$  particles), coalescence is so inefficient  
293 that the concentration changes by  $<0.1\%$ . Therefore, if aerosol from the dental instruments cannot  
294 pick up patient biological aerosol by coalescence in the oral cavity (either respirable or resulting  
295 from the dental procedure), the only remaining alternative is that the aerosol from the dental  
296 instrument deposits in the oral cavity and then, having mixed with salivary components and  
297 potentially infectious virus, is re-suspended by the instrument. This process would generate an  
298 entirely new source of aerosol and be identifiable by the emergence of an additional mode in the  
299 size distributions. Because the patient and phantom head size distributions match well for these  
300 procedures, it is unlikely the measured aerosol is contaminated by patient biological material unless  
301 the new aerosol is generated at a concentration low enough not to be resolved from the size  
302 distribution of the instrument-generated aerosol. By contrast, with both high and slow speed drilling  
303 there were differences observed between the phantom head and patient aerosol size distributions.  
304 The presence of this unexplained aerosol suggests the generation of salivary aerosol and  
305 consequently the potential for viral transmission.

306

307 Our study in patients supports findings from previous phantom head studies. Din et al. (2021),  
308 showed that orthodontic debonding using a high speed drill led to the most significant increase in  
309 particles, while combined use of the 3-in-1 air-water syringe did not result in any detectable increase  
310 in the aerosol levels. Similarly, Allison et al. (2021) and an N-of-one human volunteer study [22]  
311 found that ultrasonic scaling produces mainly instrument-generated aerosol. Similar to these groups,  
312 we found the amount of aerosol generated by ultrasonic scaling was low in comparison to high  
313 speed drilling (at least 10 times less) and intermittent, with no detectable aerosol for the majority of  
314 the time the instrument was in use. This may reflect the non-continuous use of dental instruments,  
315 that aerosol does not always escape the oral cavity, that aerosol is mitigated by use of high-volume  
316 suction, or that there is directionality to the generated aerosol plume, which cannot be continuously  
317 sampled.

318

319 Our study characterises aerosol generation during dental procedures but did not test for the  
320 presence of SARS-CoV-2, although aerosols and droplets are the vehicles that transmit SARS-CoV-2.  
321 Observation of increased aerosol generation does not confirm the potential for pathogen  
322 transmission, and it is possible we were unable to identify potential salivary aerosol if the patient  
323 size distribution were altered minimally from the phantom control or procedure generated new  
324 aerosol at such a low concentration it could not be differentiated from that generated by the dental  
325 instrument. While some air sampling studies have detected viable SARS-CoV-2, others have not, and  
326 this remains technically challenging [23-25]. The use of time-of-flight mass spectrometry (MALDI-  
327 TOF), fluorescein dye or salivary enzyme markers could be useful in determining if unexplained  
328 aerosol contains biological material from the patient. For dental instrument-generated aerosol to  
329 increase the risk of SARS-CoV-2 transmission, it must interact with saliva containing the virus, be of a  
330 size distribution that can contain SARS-CoV-2, withstand irrigant dilution, and ultimately go on to  
331 interact with a susceptible host.



332

333 In this work, the background aerosol level was low for a typical dental surgery ( $0.18 \text{ cm}^{-3}$ ), but still 50  
334 times higher than can be achieved in a laminar flow theatre setting (Brown et al. 2021). Very low  
335 levels of aerosol (e.g., from breathing or speaking) were not clearly resolved [19, 20]. Nonetheless,  
336 we accurately measured aerosol size distributions to identify differences in patient data compared  
337 to phantom head controls. Many factors that are uncontrollable in a clinical setting (e.g., patient  
338 movement, differences in use of instruments by clinicians, specific tooth or quadrant treated) will  
339 affect the aerosol number concentration, but these would minimally affect size distributions. Both  
340 sets of experiments are comparable because the set-up for phantom head controls and patient  
341 measurements were the same, including relative humidity and temperature.

342

343 While we investigated a wide range of dental procedures, it is not clear if these results can be  
344 extrapolated to the same instrument being used for a different purpose (e.g., cutting a cavity using a  
345 high speed drill) or different instruments performing the same procedure (e.g., piezo surgery instead  
346 of surgical drilling). This study limited itself to aerosols in the  $0.5\text{--}20 \mu\text{m}$  diameter size range, which  
347 includes respirable aerosol. The removal of aerosol in this size range is mainly governed by room  
348 ventilation. The studied procedures may generate larger droplets, which tend to behave more  
349 ballistically [26]. Particles smaller than those studied here ( $<0.5 \mu\text{m}$  diameter) are less likely to  
350 harbour the virus [18]. Evaporation may occur between aerosol generation and measurement,  
351 potentially altering the aerosol size distribution [27].

352

353 It has been suggested that the use of the term AGP should be reconsidered [28]. For instance,  
354 coughing can occur during any dental procedure (**Supplementary Figure 5**) and may pose a higher  
355 risk of viral transmission than many AGPs because coughing generates orders of magnitude higher  
356 aerosol number concentrations than many AGPs [29-31]. The potential for viral transmission may be

357 governed primarily by the proximity of the dental care professional to the patient, given the  
358 inevitable exposure to short range aerosol and droplet transmission of respiratory aerosol, rather  
359 than by specific dental instruments or procedure. This study provides further evidence for sources of  
360 aerosol generation during common dental procedures, enabling a more holistic approach to risk  
361 assessment [28].

362

### 363 **Author Contributions**

364 T. Dudding, S. Sheikh, F. Gregson, J. Haworth, S. Haworth, A.J. Ireland, J.P. Reid, B.R. Bzdek and M.  
365 Gormley contributed to conception and study design. T. Dudding, S. Sheikh, J. Haworth, and M.  
366 Gormley were responsible for data acquisition and curation. T. Dudding, S. Sheikh, F. Gregson, and  
367 M. Gormley drafted the initial manuscript and all authors contributed to subsequent drafts. Data  
368 analysis was carried out by T. Dudding, S. Sheikh, F. Gregson, J. Haworth, S. Haworth, J.P. Reid and  
369 B.R. Bzdek. Data interpretation and critical revisions were completed by T. Dudding, S. Sheikh, F.  
370 Gregson, J. Haworth, S. Haworth, B.G. Main, A.J. Shrimpton, F.W. Hamilton, A.J. Ireland, N.A.  
371 Maskell, B.R. Bzdek, J.P. Reid and M. Gormley and all authors helped write the final version of the  
372 manuscript. This study is part of a wider collaboration represented by the AERATOR Group who were  
373 responsible for the grant idea, writing and funding of this work. All authors gave final approval and  
374 agree to be accountable for all aspects of the work.

375

### 376 **Acknowledgements**

377 Firstly, we would like to thank the patients who volunteered to take part in this study and for  
378 recognising the value of this work. We thank all the management, administrative and clinical staff at  
379 Bristol Dental Hospital and School for their logistical support with this study. In particular Ms Sarah  
380 Bain, Dr Julie Weeks, Ms Sarah Constant, Ms Becki Bullock, Ms Kuldip Bhakerd, Ms Ceit Scott and Mr  
381 James Tubman. We also extend our thanks to the nursing staff and clinicians who assisted with the

382 patient procedures, including Dr Alex Gormley, Dr Charlotte Richards and the BSc Dental Hygiene  
383 and Therapy students. We would like to thank the Medical Equipment Management Organisation  
384 Clinical Engineering (MEMO) team at University Hospitals Bristol and Weston Foundation Trust, Mr  
385 John Woods (Nuview Ltd.) for sourcing and supplying the Jade SCA5000C Air Purification units  
386 (Surgically Clean Air®, Toronto, Ontario) and Ms Adele Carter, for her assistance with arranging the  
387 phantom head simulation equipment. Finally, we acknowledge the AERATOR Group who helped  
388 write the grant to obtain the funding for this work.

389

390 \*AERATOR Group members who contributed to this work include: Alice Milne, James Murray,  
391 Johannes Keller, Jules Brown, Andrew Shrimpton, Anthony Pickering, Timothy Cook, Mark Gormley,  
392 David Arnold, George Nava, Jonathan Reid, Bryan R Bzdek, Sadiyah Sheikh, Florence Gregson, Fergus  
393 Hamilton, Nick Maskell, James Dodd, Ed Moran.

394

### 395 **Declaration of Conflicting Interests**

396 The authors declared no potential conflicts of interest with respect to the research, authorship,  
397 and/or publication of this article. No corporate funding was received, or any material transfer  
398 agreements made with any company or sponsor.

399

### 400 **Funding**

401 The AERosolisation And Transmission Of SARS-CoV-2 in Healthcare Settings (AERATOR) study was  
402 funded by National Institute of Health Research (NIHR) (Award ID: COV0333) and has been awarded  
403 urgent public health status (IRAS-Number: 288784; CPMS-ID: 47097). T. Dudding and S. Haworth are  
404 supported by NIHR through the Academic Clinical Fellowship scheme. M. Gormley is supported by a  
405 Wellcome Trust GW4-Clinical Academic Training PhD Fellowship. This research was funded in part,  
406 by the Wellcome Trust [Grant number 220530/Z/20/Z]. For the purpose of open access, the author

407 has applied a CC BY public copyright licence to any Author Accepted Manuscript version arising from  
408 this submission. Bryan R. Bzdek is supported by the Natural Environment Research Council  
409 (NE/P018459/1).

410

## 411 **References**

- 412 1. World Health Organization. World Health Organization. Infection prevention and control  
413 during health care when novel coronavirus (nCoV) infection is suspected 2020 [Available from:  
414 <https://www.who.int/publications/i/item/10665-331495>.
- 415 2. Wilson N, Corbett S, Tovey E. Airborne transmission of covid-19. *BMJ*. 2020;370:m3206.
- 416 3. Jeong HW, Kim S-M, Kim H-S, Kim Y-I, Kim JH, Cho JY, et al. Viable SARS-CoV-2 in various  
417 specimens from COVID-19 patients. *Clinical microbiology and infection : the official publication of*  
418 *the European Society of Clinical Microbiology and Infectious Diseases*. 2020;26:1520-4.
- 419 4. Zhu J, Guo J, Xu Y, Chen X. Viral dynamics of SARS-CoV-2 in saliva from infected patients. *The*  
420 *Journal of infection*. 2020;81:e48-e50.
- 421 5. Conway DI, Culshaw S, Edwards M, Clark C, Watling C, Robertson C, et al. SARS-CoV-2  
422 Positivity in Asymptomatic-Screened Dental Patients. *J Dent Res*. 2021;100:583-90.
- 423 6. Public Health England. Public Health England. COVID-19: Infection prevention and control  
424 dental appendix 2020 [Available from:  
425 [https://assets.publishing.service.gov.uk/government/uploads/system/uploads/attachment\\_data/file](https://assets.publishing.service.gov.uk/government/uploads/system/uploads/attachment_data/file/954834/Infection_prevention_and_control_guidance_dental_appendix.pdf)  
426 [/954834/Infection\\_prevention\\_and\\_control\\_guidance\\_dental\\_appendix.pdf](https://assets.publishing.service.gov.uk/government/uploads/system/uploads/attachment_data/file/954834/Infection_prevention_and_control_guidance_dental_appendix.pdf).
- 427 7. Ehtezazi T, Evans DG, Jenkinson ID, Evans PA, Vadgama VJ, Vadgama J, et al. SARS-CoV-2:  
428 characterisation and mitigation of risks associated with aerosol generating procedures in dental  
429 practices. *Br Dent J*. 2021:1-7.

- 430 8. Szymańska J. Dental bioaerosol as an occupational hazard in a dentist's workplace. *Ann Agric*  
431 *Environ Med.* 2007;14:203-7.
- 432 9. Shahdad S, Patel T, Hindocha A, Cagney N, Mueller J-D, Seoudi N, et al. The efficacy of an  
433 extraoral scavenging device on reduction of splatter contamination during dental aerosol generating  
434 procedures: an exploratory study. *British Dental Journal.* 2020.
- 435 10. Public Health England. Public Health England. COVID-19: Guidance for maintaining services  
436 within health and care settings: Infection prevention and control recommendations. 2021 [Available  
437 from:  
438 [https://assets.publishing.service.gov.uk/government/uploads/system/uploads/attachment\\_data/file](https://assets.publishing.service.gov.uk/government/uploads/system/uploads/attachment_data/file/954690/Infection_Prevention_and_Control_Guidance_January_2021.pdf)  
439 [/954690/Infection\\_Prevention\\_and\\_Control\\_Guidance\\_January\\_2021.pdf](https://assets.publishing.service.gov.uk/government/uploads/system/uploads/attachment_data/file/954690/Infection_Prevention_and_Control_Guidance_January_2021.pdf).
- 440 11. Innes N, Johnson IG, Al-Yaseen W, Harris R, Jones R, Kc S, et al. A systematic review of  
441 droplet and aerosol generation in dentistry. *Journal of dentistry.* 2021;105:103556-.
- 442 12. Leggat PA, Kedjarune U. Bacterial aerosols in the dental clinic: a review. *Int Dent J.*  
443 2001;51:39-44.
- 444 13. Harrel SK, Molinari J. Aerosols and splatter in dentistry: a brief review of the literature and  
445 infection control implications. *J Am Dent Assoc.* 2004;135:429-37.
- 446 14. Dawson M, Soro V, Dymock D, Price R, Griffiths H, Dudding T, et al. Microbiological  
447 assessment of aerosol generated during debond of fixed orthodontic appliances. *Am J Orthod*  
448 *Dentofacial Orthop.* 2016;150:831-8.
- 449 15. Allison JR, Currie CC, Edwards DC, Bowes C, Coulter J, Pickering K, et al. Evaluating aerosol  
450 and splatter following dental procedures: Addressing new challenges for oral health care and  
451 rehabilitation. *Journal of Oral Rehabilitation.* 2021;48:61-72.

- 452 16. Veena HR, Mahantesha S, Joseph PA, Patil SR, Patil SH. Dissemination of aerosol and splatter  
453 during ultrasonic scaling: A pilot study. *Journal of Infection and Public Health*. 2015;8:260-5.
- 454 17. Din AR, Hindocha A, Patel T, Sudarshan S, Cagney N, Koched A, et al. Quantitative analysis of  
455 particulate matter release during orthodontic procedures: a pilot study. *British Dental Journal*.  
456 2020;<https://doi.org/10.1038/s41415-020-2280-5>.
- 457 18. Fennelly KP. Particle sizes of infectious aerosols: implications for infection control. *Lancet*  
458 *Respir Med*. 2020;8:914-24.
- 459 19. Gregson FKA, Sheikh S, Archer J, Symons HE, Walker JS, Haddrell AE, et al. Analytical  
460 challenges when sampling and characterising exhaled aerosol. *Aerosol Science and Technology*.  
461 2021;1-16.
- 462 20. Gregson FKA, Watson NA, Orton CM, Haddrell AE, McCarthy LP, Finnie TJR, et al. Comparing  
463 aerosol concentrations and particle size distributions generated by singing, speaking and breathing.  
464 *Aerosol Science and Technology*. 2021;55:681-91.
- 465 21. Hinds WC. *Aerosol Technology: Properties, Behavior, and Measurement of Airborne*  
466 *Particles*: John Wiley & Sons; 1999. 262-3 p.
- 467 22. Yang M, Chaghtai A, Melendez M, Hasson H, Whitaker E, Badi M, et al. Mitigating saliva  
468 aerosol contamination in a dental school clinic. *BMC Oral Health*. 2021;21:52.
- 469 23. Greenhalgh T, Jimenez JL, Prather KA, Tufekci Z, Fisman D, Schooley R. Ten scientific reasons  
470 in support of airborne transmission of SARS-CoV-2. *Lancet*. 2021;1;397(10285):1603-1605.
- 471 24. Borges JT, Nakada LYK, Maniero MG, Guimarães JR. SARS-CoV-2: a systematic review of  
472 indoor air sampling for virus detection. *Environmental Science and Pollution Research*. 2021;25:1–  
473 14.

- 474 25. Meethil AP, Saraswat S, Chaudhary PP, Dabdoub SM, Kumar PS. Sources of SARS-CoV-2 and  
475 Other Microorganisms in Dental Aerosols. *J Dent Res*. 2021: 220345211015948.
- 476 26. Micik RE, Miller RL, Mazarella MA, Ryge G. Studies on dental aerobiology. I. Bacterial  
477 aerosols generated during dental procedures. *J Dent Res*. 1969;48:49-56.
- 478 27. Walker JS, Archer J, Gregson FKA, Michel SES, Bzdek BR, Reid JP. Accurate Representations of  
479 the Microphysical Processes Occurring during the Transport of Exhaled Aerosols and Droplets. *ACS*  
480 *Central Science*. 2021;7:200-9.
- 481 28. Hamilton F, Arnold D, Bzdek BR, Dodd J, Reid J, Maskell N. Aerosol generating procedures:  
482 are they of relevance for transmission of SARS-CoV-2? *Lancet Respir Med*. 2021;S2213-  
483 2600(21)00216-2.
- 484 29. Gregson FKA, Shrimpton AJ, Hamilton F, Cook TM, Reid JP, Pickering AE, et al. Identification  
485 of the source events for aerosol generation during oesophago-gastro-duodenoscopy. *Gut*.  
486 2021:gutjnl-2021-324588.
- 487 30. Hamilton F, Gregson F, Arnold D, Sheikh S, Ward K, Brown J, et al. Aerosol emission from the  
488 respiratory tract: an analysis of relative risks from oxygen delivery systems. *Thorax*. 2021;  
489 [doi.org/10.1136/thoraxjnl-2021-217577](https://doi.org/10.1136/thoraxjnl-2021-217577).
- 490 31. Sheikh S, Hamilton FW, Nava GW, Gregson FKA, Arnold DT, Riley C, et al. Are Aerosols  
491 Generated During Lung Function Testing in Patients and Healthy Volunteers? Results From the  
492 AERATOR Study. *Thorax*. 2021; [doi: 10.1136/thoraxjnl-2021-217671](https://doi.org/10.1136/thoraxjnl-2021-217671).
- 493
