# Supplementary material for: A clinical observational analysis of aerosol emissions from dental procedures
Source: bioRxiv or medRxiv preprint supplement (doi:10.1101/2021.06.09.21258479), 2021-11-01
Supplement: Supplementary file [file media-1.pdf]

# **A clinical observational analysis of aerosol emissions from dental procedures.**

## **Authors**

T. Dudding, S. Sheikh, F. Gregson, J. Haworth, S. Haworth, B.G. Main, A.J. Shrimpton, F.W. Hamilton, A.J. Ireland, N.A. Maskell, J.P. Reid, B.R. Bzdek, M. Gormley

## **Supplemental Material**

### **Supplementary Methods**

#### *Environment and equipment*

The Optical Particle Sizer (OPS) (TSI Incorporated, model 3330, Shoreview, NM, USA) samples air at 1 L min<sup>-1</sup> and detects particles by laser optical scattering and reports the particle number concentration and optical size distribution within the diameter range 300 nm to 10 µm, with a time resolution of 1s. The OPS is calibrated by the manufacturer using polystyrene latex spheres and its performance conforms to the ISO standard 21501-4:2018. The reported optical size of the particles was based on an assumed refractive index of pure water at 600nm wavelength (1.333). The Aerodynamic Particle Sizer (APS) (TSI Incorporated, model 3321, Shoreview, NM, USA) measures at a sampling flow rate of 1 L min<sup>-1</sup> with accompanying sheath flow of 4 L min<sup>-1</sup>. In addition, it reports the aerodynamic size of particles in an aerosol plume, size-resolving aerosol number concentration into 52 size bins ranging from 0.5 µm to 20 µm in diameter, with a time integration of 1s. The size bins are equally spaced in log(diameter) space, apart from the smallest size bin (0.5 - 0.523 µm). Both OPS and APS data could be compared, however APS data only is reported in this paper given the increased sensitivity of this instrument.

All dental treatment was carried out in the same enclosed side room with dimensions measuring 4.27m x 3.89m x 2.60m. A clean background environment was created in the treatment room by closing external ventilation vents and using three Jade SCA5000C Air Purification units (Surgically Clean Air©, Toronto, Ontario) on Turbo mode ( $690\text{m}^3\text{ h}^{-1}$ ), with ultrafine particulate filtration using HEPA-Rx. These units were placed in the corners of the room, as far as possible from the dental chair to sufficiently reduce background particulate number concentration sufficiently (allowing for sensitive aerosol measurements in the outpatient setting) while not acting to reduce the amount of aerosol being recorded at the sampling funnel. This resulted in a mean background concentration of  $0.18$  (+/- SD  $0.12$ ) particles  $\text{cm}^{-3}$  reported by the APS and OPS. UK Infection Prevention Control Guidance standards were followed, including the use of level 3 PPE and FFP3 masks worn by all members of the team, with effective decontamination between patients and a fallow time of 15mins implemented based on the measured air changes per hour  $>10$ .

#### *Patient dental procedure aerosol measurement*

A brief description of the various procedures carried out and equipment used is given below:

- Periodontal treatment: which included examination with a BPE (World Health Organisation) probe, full mouth supragingival scaling or root surface debridement (RSD) of one or two mouth quadrants under local anaesthetic using a Cavitron® Select™ SPS™ (Denstply Sirona, York, USA) ultrasonic scaler (USS) and hand scaling instruments.
- Oral surgery treatment: which included routine dental forceps extractions or the surgical removal of teeth, using a OsseoDoc Drill system (Bien-Air Dental SA, Switzerland) and a straight handpiece (W&H Dentalwerk Bürmoos GmbH, Austria)) with round and fissure burs for bone removal, operating at a drive speed of 40,000 rpm with 0.9% saline coolant.

- Orthodontic debond treatment was performed using band and bracket removers (Ixion™, DB Orthodontics, Keighley, UK). Both high speed KaVO™ Bellatorque Mini Lux3 637B (KaVo™ Dental GmbH, Biberach, Germany) at  $\geq 385,000$  rpm and slow speed air turbines (KaVo™ Dental GmbH, Biberach, Germany), with tungsten carbide debonding burs (8 flute, 0.016" diameter, Prima Dental, Gloucester, UK) were used to remove the residual composite or glass ionomer material from each tooth. Each patient had one arch removed with the high speed drill (with water irrigation) and one with the slow drill (no water irrigation) with the arch used for each alternating for each patient. Post-treatment alginate impressions and clinical photographs using cheek retractors and an occlusal mirror were taken.

Wide bore high volume aspiration at  $300 \text{ L min}^{-1}$  was used during all procedures except oral surgery, for which Medi-Vac™ suction at  $60 \text{ L min}^{-1}$ , with a Yankeur suction tip was used.

Detailed protocols were written in Microsoft® Excel® with built-in time macros, to accurately time-stamp each procedure (**Appendices 1 – 3**), using a standardised approach. These protocols could easily be adapted as required, given the possibility for *ad hoc* events which may occur as part of the procedure (e.g., patient coughing).

#### *Phantom head control procedure aerosol measurement*

Where aerosol was detected in patients and where practical, these procedures were repeated on a phantom head to mimic the patient treatment as closely as possible. The assumption being that in the phantom head model, the aerosol size distributions sampled represent the uncontaminated instrument aerosol source only and can be used to detect where patient aerosol distributions differ may differ from this. Phantom head units were placed in the same position as the patient, using the same equipment and set-up. For the 3-in-1 syringe (air, water, and combined air + water) and

removal of residual composite following orthodontic debond with high-speed and slow-speed air turbines, the patient procedure was replicated in the phantom head. For the ultrasonic instrument, it was only practical to replicate supragingival scaling and for the surgical drill, this was used within the phantom head in the same motion and region of the lower third molar teeth as it would be used in a patient, but without contacting the phantom head jaws.

## **Statistical analysis**

### *Data processing and fitting*

When an instrument was in operation and the APS detected aerosol, the aerosol number concentration and the size distribution data (with fixed size bin of 0.03125 for APS instrument) was extracted for further analysis. The aerosol number concentration and particles per size bin were divided by the sampling number (1 sample was 1 second) to get the mean particle number per 1 sample per  $\text{cm}^{-3}$ . For each patient, an aerosol number concentration and particles per size bin were calculated from all the repeats of each instrument signal detected. The patient values were combined to generate a procedure aerosol number concentration and were described by medians and interquartile ranges. For each procedure, mean aerosol number concentrations (dN) for a range of particle size bins ( $D_p$ ) were calculated by averaging across patients. These were transformed ( $\text{dN}/\text{dLog}(D_p)/\text{cm}^{-3}$ ) in order to normalise the data (by dividing by the logarithm of the bin width ( $\mu\text{m}$ ) of 0.03125 (APS)), enabling visual comparison of the size distribution in a standardised form typical for reporting aerosol size distributions. Analysis involved fitting the patient and phantom control size distribution separately for each procedure to the modal Supplementary Equation 1 to either a bimodal or multimodal fit to determine the best fit by statistical analysis coefficient of determination-  $r^2$  in Origin 2021 (Origin Lab Corporation, Massachusetts). The closer  $r^2$  was to 1, the better the fit.

$$\frac{dN}{d\text{Log}(D_p)} = \Sigma \frac{N}{(2\pi)^{0.5} \log(\sigma)} \exp \frac{-(\log D_p - \log D_{p,c})^2}{2(\log \sigma)^2}$$

**Supplementary Equation 1.** The mean APS size distribution data for each instrument was fitted to the multimodal lognormal equation. The  $D_p$  is the particle diameter ( $\mu\text{m}$ ),  $D_{p,c}$  is the particle diameter at the mode centre,  $\log(\sigma)$  relates to the mode width and  $N$  is the mode amplitude and related to the sampled concentration ( $\text{cm}^{-3}$ ). Fitting was conducted in Origin 2021 (Origin Lab Corporation, Massachusetts).

**Supplementary Table 1.** Baseline characteristics of patients for each treatment, by specialty.

|                           | <b>Treatment by specialty</b> |              |                    |              |
|---------------------------|-------------------------------|--------------|--------------------|--------------|
|                           | Periodontal                   | Oral surgery | Orthodontic debond | Total        |
| <b>N (%)</b>              | 13 (32)                       | 11 (27)      | 17 (41)            | 41 (100)     |
| <b>Median age (range)</b> | 52 (30 – 75)                  | 36 (21 – 50) | 18 (18 – 33)       | 47 (18 – 75) |
| <b>Sex (%)</b>            |                               |              |                    |              |
| <b>Male (%)</b>           | 6 (46)                        | 4 (36)       | 8 (47)             | 18 (44)      |
| <b>Female (%)</b>         | 7 (54)                        | 7 (64)       | 9 (53)             | 23 (56)      |
| <b>Median BMI (range)</b> | 26 (18 – 37)                  | 29 (21 – 35) | 23 (17 – 30)       | 24 (17 – 37) |
| <b>Ethnicity</b>          |                               |              |                    |              |
| <b>White (%)</b>          | 13 (100)                      | 9 (82)       | 15 (88)            | 37 (90)      |
| <b>Asian (%)</b>          | 0 (0)                         | 0 (0)        | 1 (6)              | 1 (3)        |
| <b>Black (%)</b>          | 0 (0)                         | 2 (18)       | 1 (6)              | 3 (7)        |

**Supplementary Table 2.** Dental procedures included in the study, the sampling time and percentage time aerosol detected.

| <b>Procedure</b>                          | <b>Number of measurement repeats</b> | <b>Total sampling time for procedure (s)</b> | <b>Time aerosol detected above background (s)</b> | <b>Percentage time aerosol detected above background (%)</b> |
|-------------------------------------------|--------------------------------------|----------------------------------------------|---------------------------------------------------|--------------------------------------------------------------|
| Examination (inc. probing)                | 25                                   | 4020                                         | 0                                                 | 0                                                            |
| Hand scaling                              | 3                                    | 935                                          | 0                                                 | 0                                                            |
| Routine extraction (non-surgical)         | 6                                    | 1128                                         | 0                                                 | 0                                                            |
| Soft tissue flap raising                  | 8                                    | 1116                                         | 0                                                 | 0                                                            |
| Bracket removal (debonding and debanding) | 14                                   | 2098                                         | 0                                                 | 0                                                            |
| Alginate impressions (upper and lower)    | 27                                   | 1824                                         | 0                                                 | 0                                                            |
| Local anaesthetic                         | 37                                   | 3120                                         | 0                                                 | 0                                                            |
| Ultrasonic scaling (USS)                  | 12                                   | 12272                                        | 1559                                              | 12.7                                                         |
| 3in1 – water only                         | 20                                   | 961                                          | 0                                                 | 0                                                            |
| 3in1 – air only                           | 35                                   | 801                                          | 199                                               | 19.9                                                         |
| 3in1 – air + water                        | 33                                   | 772                                          | 581                                               | 42.9                                                         |
| High speed drilling                       | 15                                   | 3,849                                        | 1,543                                             | 28.6                                                         |
| Slow speed drilling                       | 15                                   | 3,324                                        | 1,632                                             | 32.9                                                         |
| Surgical drilling                         | 9                                    | 568                                          | 316                                               | 35.8                                                         |
| Suturing                                  | 9                                    | 1986                                         | 0                                                 | 0                                                            |

**Supplementary Figure 1.** Aerosol size distribution graphs on a y-axis linear scale of (a-f) dental procedures where aerosol signal was greater than the average background aerosol concentration. Both mean patient (purple) and phantom control (light blue) ( $\pm$  standard error) data are presented.

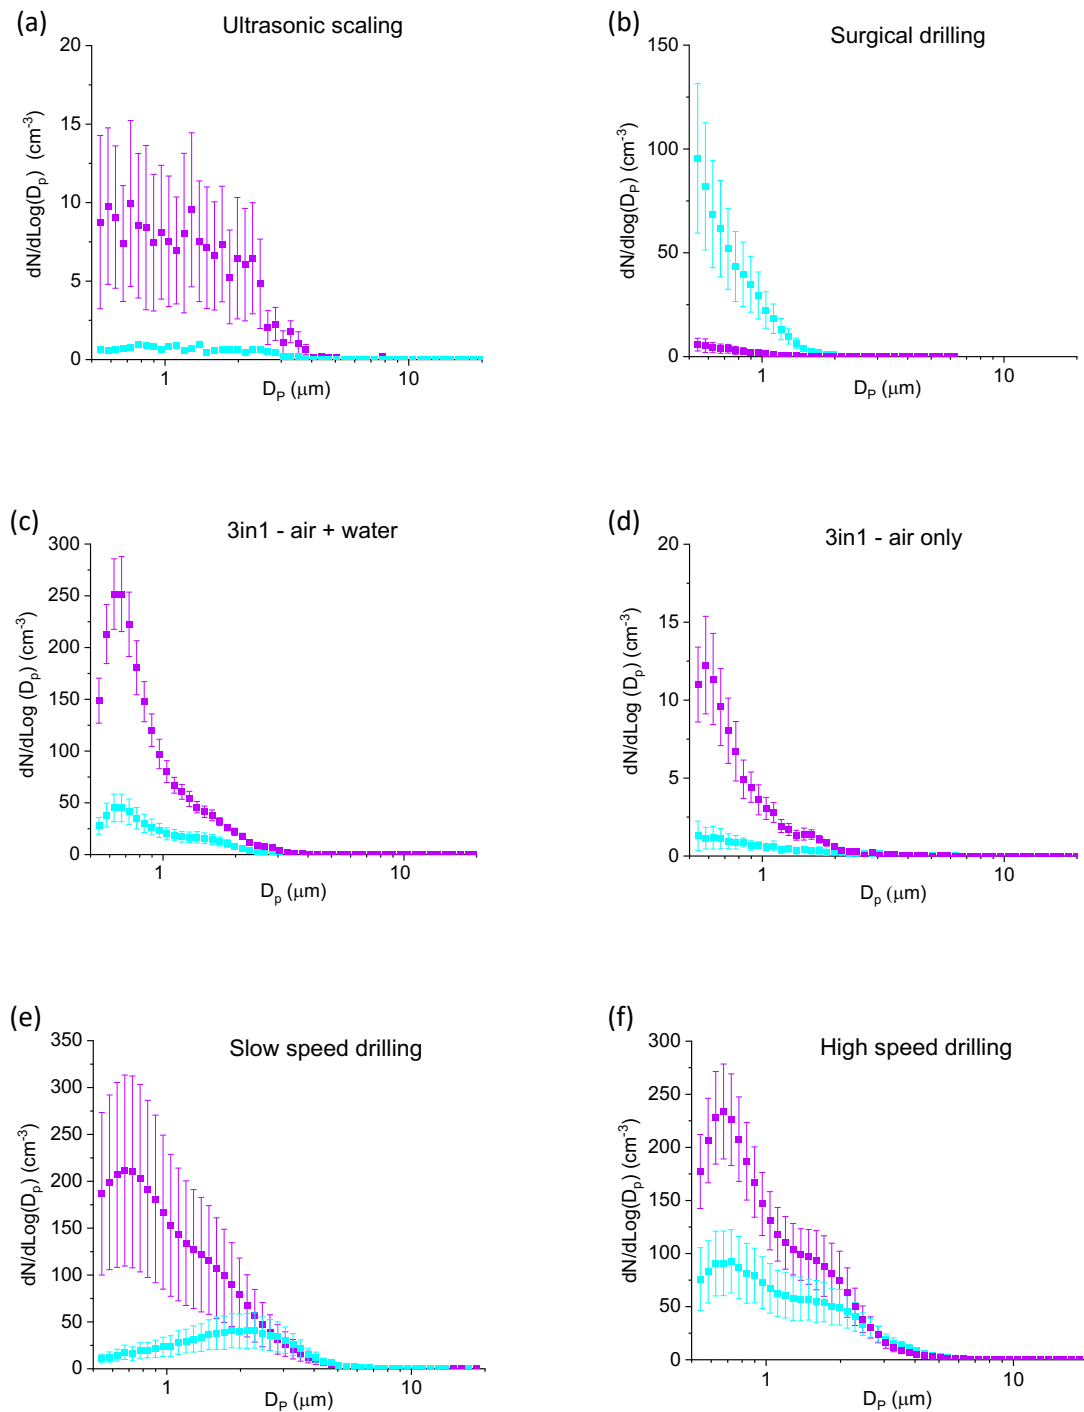



**Supplementary Figure 2.** Aerosol size distribution graphs on a logarithmic scale of (a-f) dental procedures and (g) patient baseline measurements, where aerosol signal was greater than the average background aerosol number concentration. Both mean patient (purple) and phantom control (light blue) ( $\pm$  standard error) data are presented.

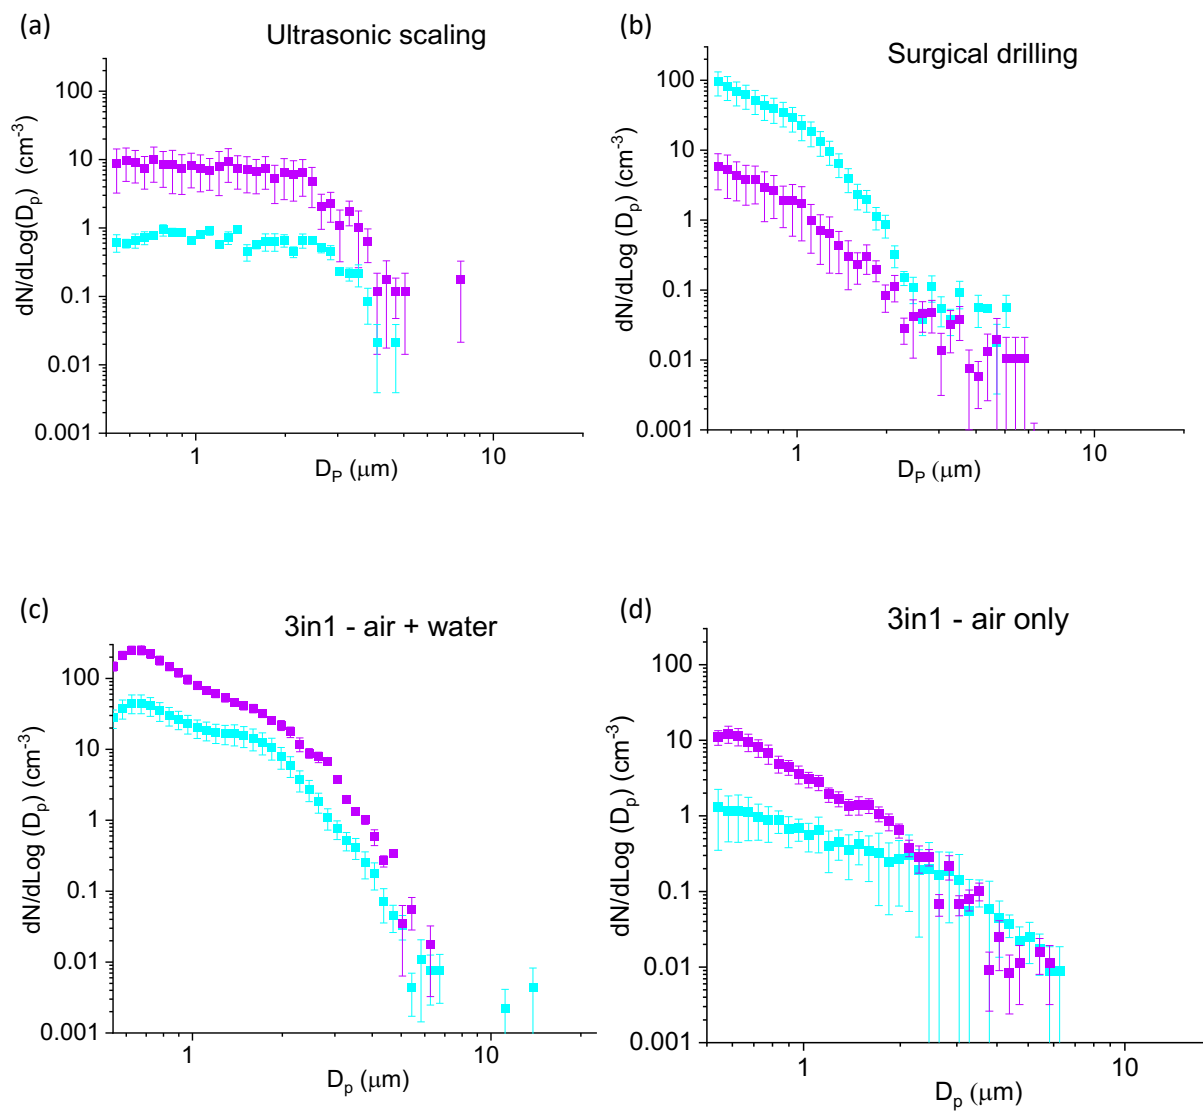

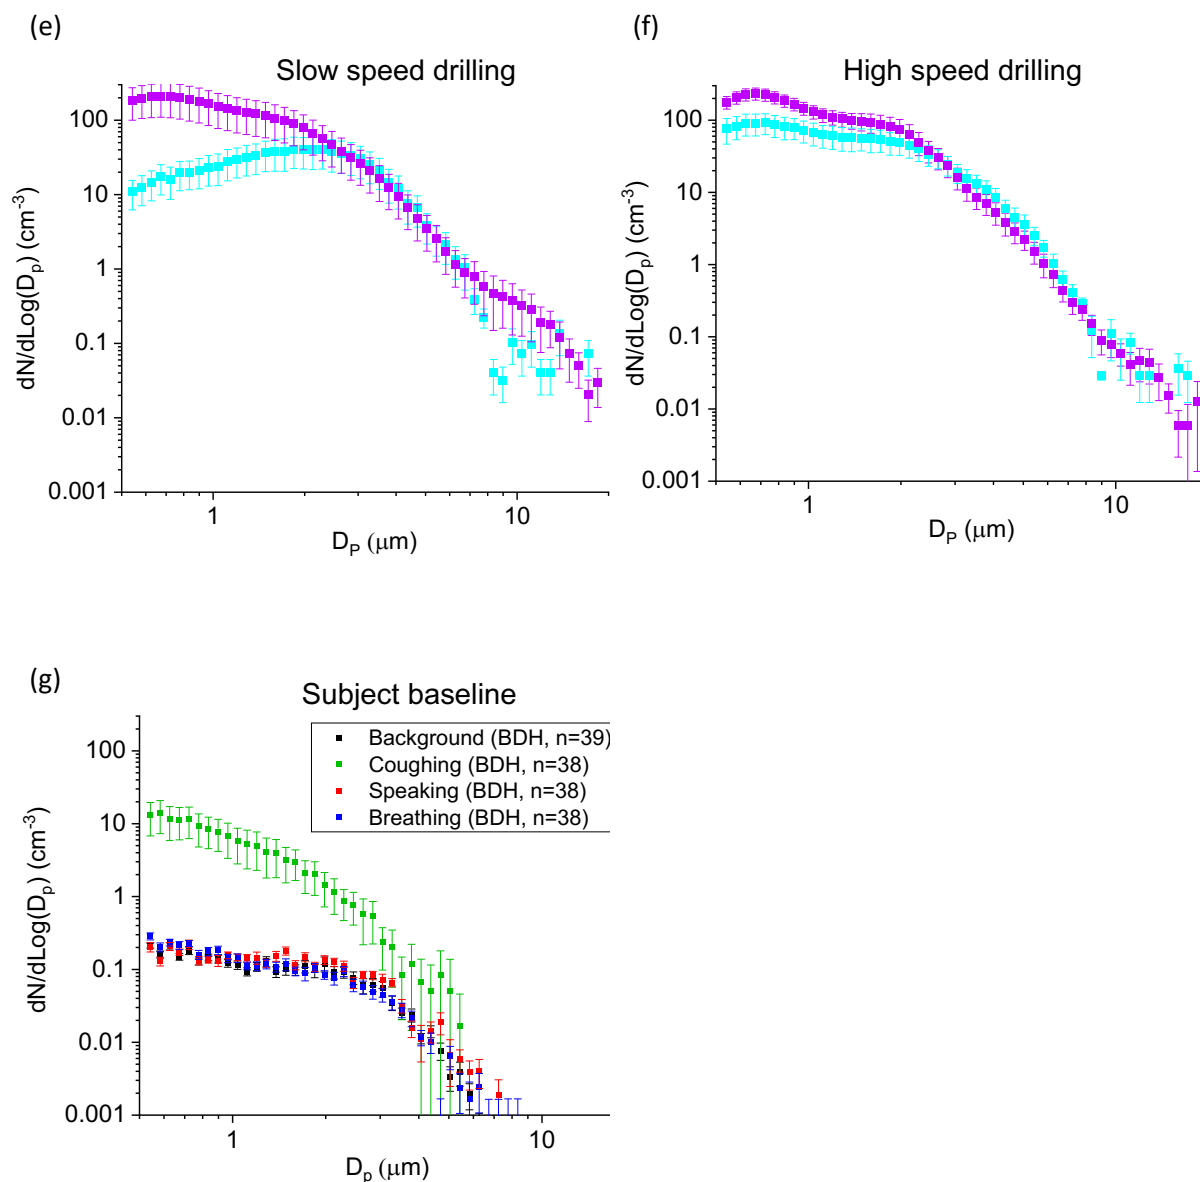

**Supplementary Figure 3.** Fitting of mean size distribution graphs (patient and phantom control) to equation 1. Mode 1 is shown as the red line, mode 2 as the green line, mode 3 (where present) as the dark blue line and the cumulative line of all modes is the mid-blue

line. The red area shows the 95% confidence band of the fitting. Fitting correlation  $r^2$  values are shown.

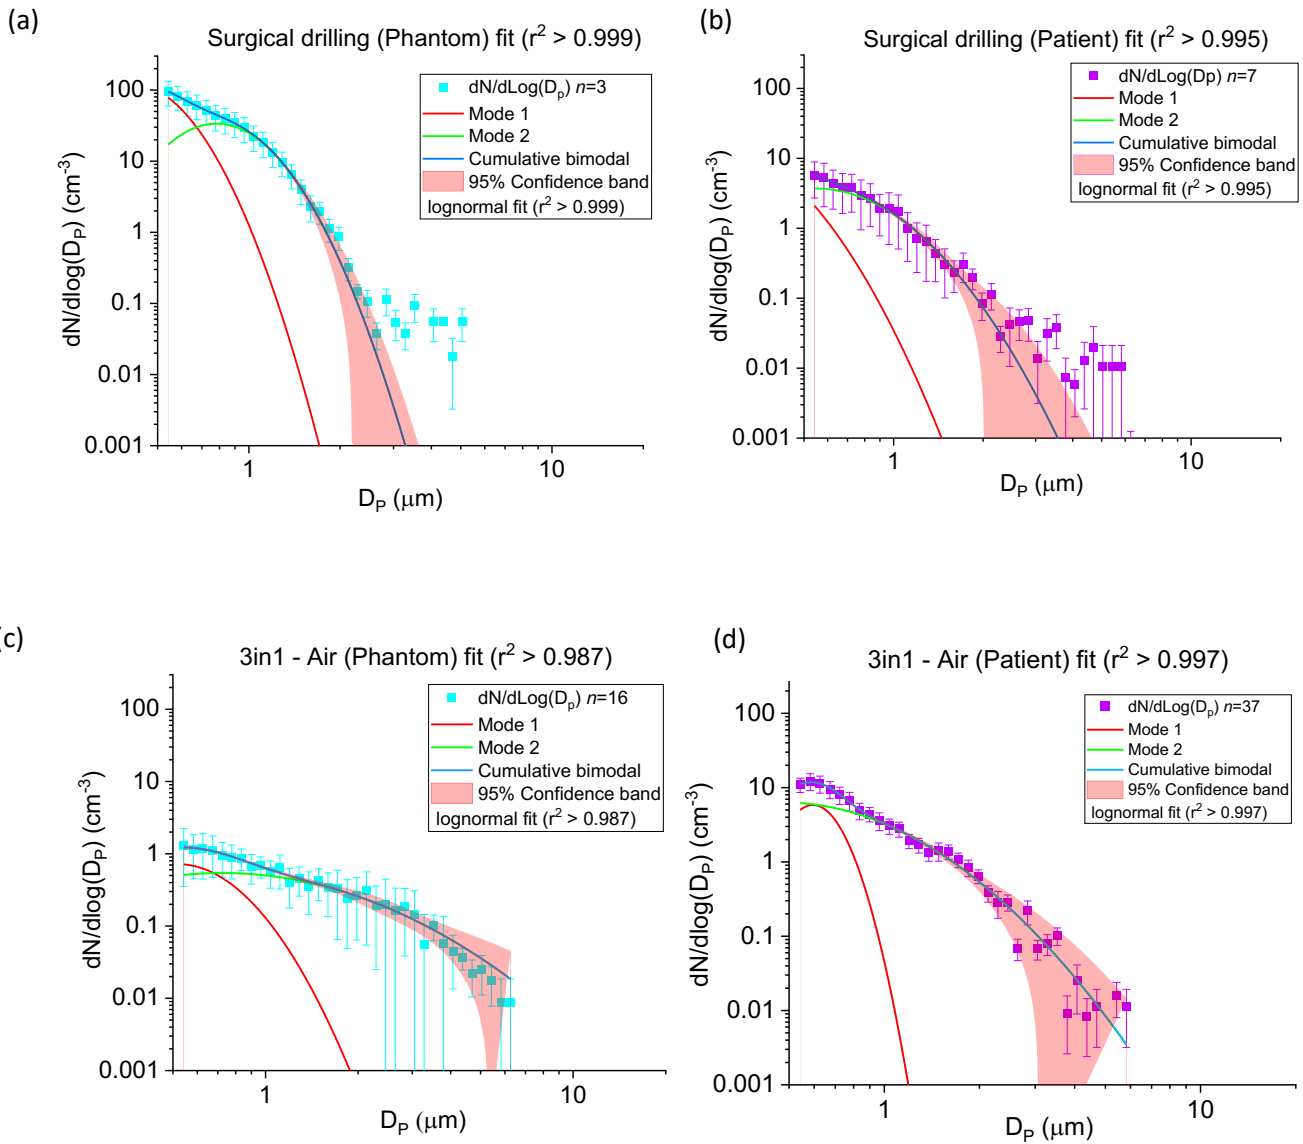

(e) High speed drilling (Phantom) fit ( $r^2 > 0.999$ )

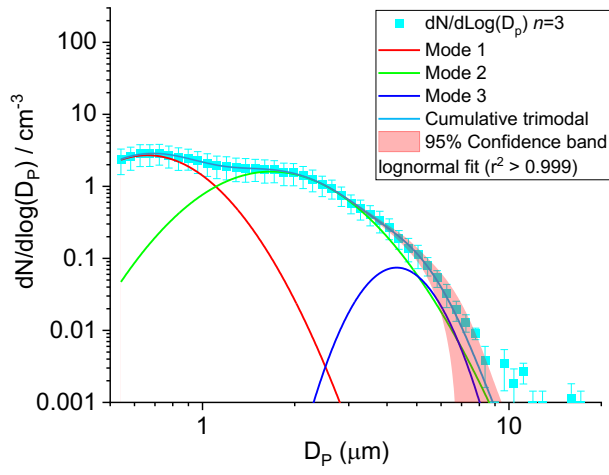

(f) High speed drilling (Patient) fit  $r^2 > 0.999$

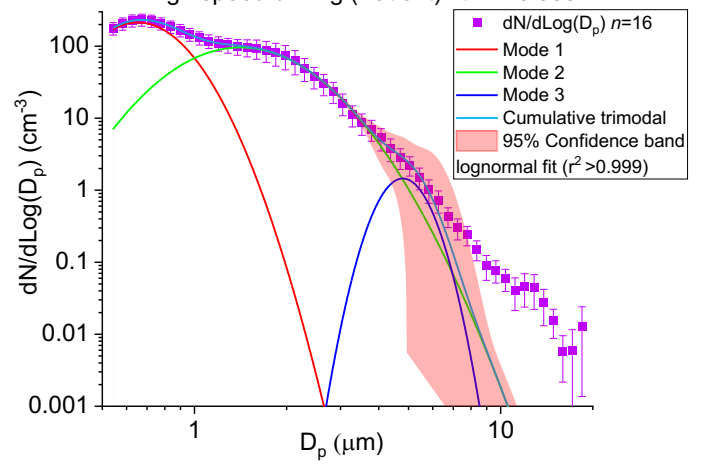

### Additional time series graphs of treatments

Example time series for a typical periodontal, oral surgery and orthodontic procedure are included.

These are annotated with the time-stamped information as per the protocols (**Appendices 1 – 3**).

For example, for ultrasonic scaling shown as A-K, with variability in signal attributed to the fact that the aerosol plume generated was directional and we were sampling at a fixed point (11 o'clock funnel position) (**Supplementary Figures 4 – 6**).

### Supplementary Figure 4. Time series graph for scale and polish treatment on a patient.

Procedures carried out during this treatment were A-K as shown. Area under blue bracket indicates the time period the procedure was conducted over. Data shows aerosol number concentration over time during the treatment. Insert graph shows baseline measurements (A in main graph). Note that breathing and speaking emit similar or fewer particles than the pre-existing background concentration.

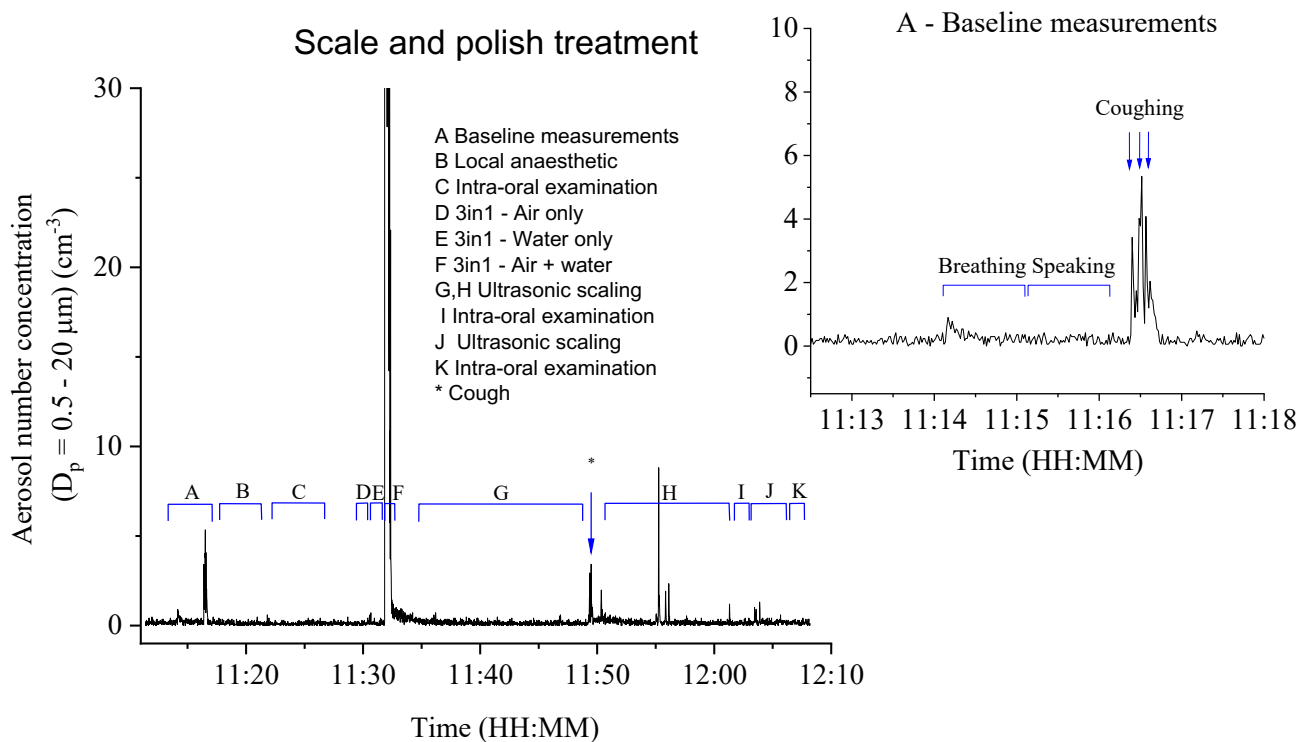

**Supplementary Figure 5.** Time series of surgical removal of a third molar (wisdom) tooth.

Procedures being carried out within a treatment are shown under the blue bracket and described with corresponding alphabetic key.

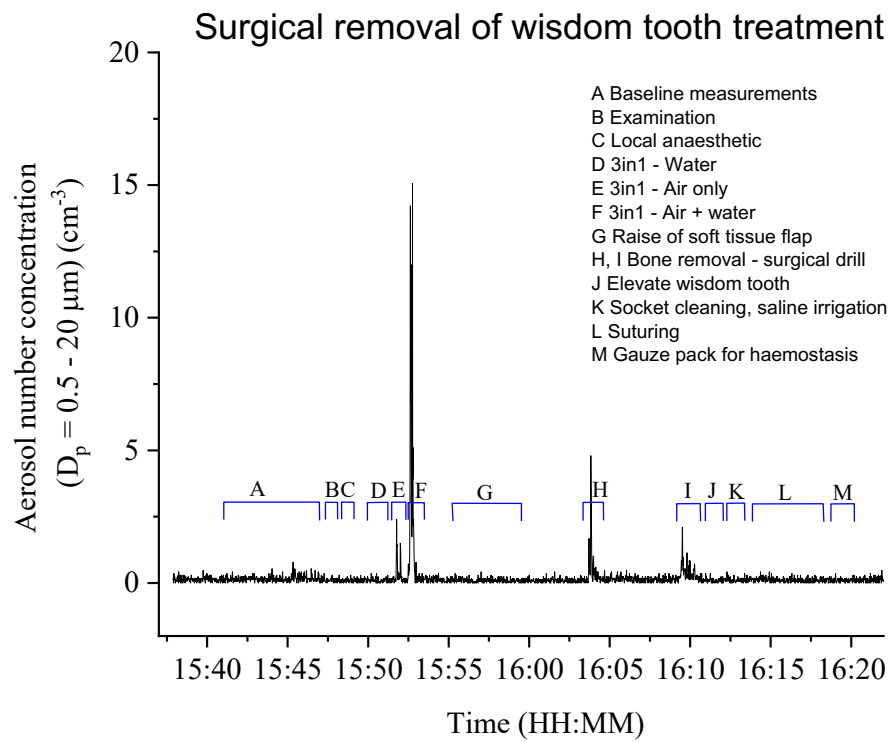

**Supplementary Figure 6.** Time series of an orthodontic debond procedure. Procedures being carried out within a treatment are shown under the blue bracket and described with corresponding alphabetic key.

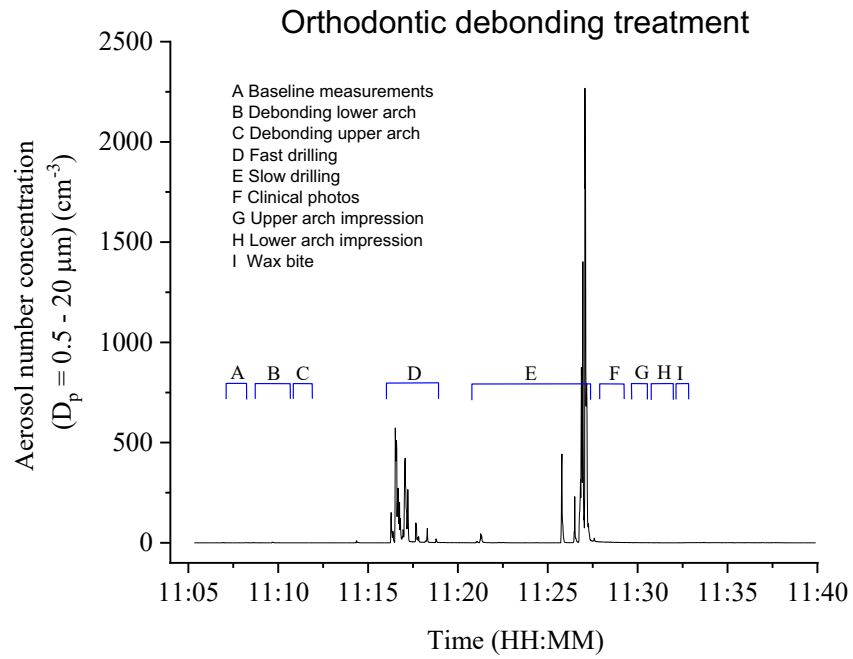

**Appendix 1.** Example of a time-stamped protocol for periodontal treatment

| Activity                         | Timestamping |          | Comments             |
|----------------------------------|--------------|----------|----------------------|
| Background                       | Start        | 13:41:44 |                      |
|                                  | Stop         | 13:45:04 |                      |
| Breathing                        | Start        | 13:46:27 |                      |
|                                  | Stop         | 13:47:27 |                      |
| Speaking                         | Start        | 13:48:00 |                      |
|                                  | Stop         | 13:49:00 |                      |
| Cough1                           | Start        | 13:49:31 |                      |
| Cough2                           | Start        | 13:49:55 |                      |
| Cough 3                          | Start        | 13:50:28 |                      |
| Examination                      | Start        | 13:51:27 |                      |
|                                  | Stop         | 13:52:54 |                      |
| 3in1 - Air                       | Start        | 14:00:17 |                      |
|                                  | Stop         | 14:00:47 |                      |
| 3in1 - water only (with suction) | Start        | 14:01:33 |                      |
|                                  | Stop         | 14:02:03 |                      |
| 3in1 air + water (with suction)  | Start        | 14:02:35 |                      |
|                                  | Stop         | 14:03:05 |                      |
| Scale                            | Start        | 14:03:56 | Lower right quadrant |
|                                  | Stop         | 14:08:56 |                      |
| Scale                            | Start        | 14:09:27 | Lower left quadrant  |
|                                  | Stop         | 14:14:15 |                      |
| Scale                            | Start        | 14:14:18 | Lower right quadrant |



|                         |       |          |                      |
|-------------------------|-------|----------|----------------------|
|                         | Stop  | 14:15:45 |                      |
| Scale                   | Start | 14:16:09 | Upper right quadrant |
|                         | Stop  | 14:20:24 |                      |
| Scale                   | Start | 14:20:27 | Lower anterior teeth |
|                         | Stop  | 14:22:51 |                      |
| Scale                   | Start | 14:23:09 | Upper left quadrant  |
|                         | Stop  | 14:25:31 |                      |
| Intra-oral probing exam | Start | 14:25:48 |                      |
|                         | Stop  | 14:27:27 |                      |
| Scale                   | Start | 14:27:32 | Upper left quadrant  |
|                         | Stop  | 14:28:53 |                      |

END OF TREATMENT

**Appendix 2.** Example of a time-stamped protocol for oral surgery treatment

| Activity                         | Timestamping |          | Comments                                             |
|----------------------------------|--------------|----------|------------------------------------------------------|
| Background                       | Start        | 10:31:24 |                                                      |
|                                  | Stop         | 10:35:02 |                                                      |
| Breathing                        | Start        | 10:35:47 |                                                      |
|                                  | Stop         | 10:35:48 |                                                      |
| Speaking                         | Start        | 10:36:00 |                                                      |
|                                  | Stop         | 10:37:00 |                                                      |
| Cough1                           | Start        | 10:37:32 |                                                      |
| Cough2                           | Start        | 10:38:02 |                                                      |
| Cough 3                          | Start        | 10:38:38 |                                                      |
| Examination                      | Start        | 10:52:27 | Check and confirm tooth to be removed                |
|                                  | Stop         | 10:54:02 |                                                      |
| Local anaesthetic                | Start        | 10:54:46 | Left side inferior dental nerve block                |
|                                  | Stop         | 10:55:24 |                                                      |
| Local anaesthetic                | Start        | 10:55:59 | Left side long buccal nerve block plus infiltrations |
|                                  | Stop         | 10:56:32 |                                                      |
| 3in1 - Air                       | Start        | 10:57:00 |                                                      |
|                                  | Stop         | 10:57:30 |                                                      |
| 3in1 - water only (with suction) | Start        | 10:58:03 |                                                      |
|                                  | Stop         | 10:58:33 |                                                      |
| 3in1 air + water (with suction)  | Start        | 10:59:01 |                                                      |

|                                       |       |          |                                             |
|---------------------------------------|-------|----------|---------------------------------------------|
|                                       | Stop  | 10:59:31 |                                             |
| Raise soft tissue flap                | Start | 11:05:18 | Lower left third molar (LL8) tooth          |
|                                       | Stop  | 11:05:39 |                                             |
| Bone removal with surgical drill      | Start | 11:06:21 | Around tooth LL8 buccal                     |
|                                       | Stop  | 11:07:02 |                                             |
| Bone removal with surgical drill      | Start | 11:07:59 | Around tooth LL8 buccal                     |
|                                       | Stop  | 11:08:49 |                                             |
| Tooth sectioning using surgical drill | Start | 11:09:39 | Tooth LL8                                   |
|                                       | Stop  | 11:10:31 |                                             |
| Elevate sectioned tooth               | Start | 11:11:02 |                                             |
|                                       | Stop  | 11:12:21 |                                             |
| Socket curettage                      | Start | 11:14:15 | LL8 socket                                  |
|                                       | Stop  | 11:14:55 |                                             |
| Saline irrigation                     | Start | 11:15:21 | LL8 socket                                  |
|                                       | Stop  | 11:16:01 |                                             |
| Gauze pack placed for haemostasis     | Start | 11:16:22 | LL8 socket                                  |
|                                       | Stop  | 11:28:15 | Final examination and check for haemostasis |

END OF TREATMENT

**Appendix 3.** Example of a time-stamped protocol for orthodontic treatment

| Activity                                                                | Timestamping |          | Comments   |
|-------------------------------------------------------------------------|--------------|----------|------------|
| Background                                                              | Start        | 11:07:37 |            |
|                                                                         | Stop         | 11:11:33 |            |
| Breathing                                                               | Start        | 11:11:39 |            |
|                                                                         | Stop         | 11:12:39 |            |
| Speaking                                                                | Start        | 11:12:59 |            |
|                                                                         | Stop         | 11:14:13 |            |
| Cough1                                                                  | Start        | 11:14:28 |            |
| Cough2                                                                  | Start        | 11:14:45 |            |
| Cough3                                                                  | Start        | 11:15:03 |            |
| Examination                                                             | Start        | 11:15:51 |            |
|                                                                         | Stop         | 11:17:23 |            |
| Use of debonding pliers and debanding pliers to remove fixed appliances | Start        | 11:17:27 | Upper arch |
|                                                                         | Stop         | 11:19:34 |            |
| Use of debonding pliers and debanding pliers to remove fixed appliances | Start        | 11:19:36 | Lower arch |
|                                                                         | Stop         | 11:21:03 |            |
| 3-in-1 air + water                                                      | Start        | 11:21:19 |            |
|                                                                         | Stop         | 11:21:49 |            |
| 3-in-1 water                                                            | Start        | 11:22:12 |            |
|                                                                         | Stop         | 11:22:42 |            |

|                                                                 |       |          |                              |
|-----------------------------------------------------------------|-------|----------|------------------------------|
| 3-in-1 air                                                      | Start | 11:22:57 |                              |
|                                                                 | Stop  | 11:23:27 |                              |
| Use of slow speed on upper teeth (to remove composite material) | Start | 11:24:13 | Upper arch composite removal |
|                                                                 | Stop  | 11:28:43 |                              |
| Use of high speed on lower teeth (to remove composite material) | Start | 11:29:03 | Lower arch composite removal |
|                                                                 | Stop  | 11:31:51 |                              |
| Lower arch impression using alginate                            | Start | 11:36:35 |                              |
|                                                                 | Stop  | 11:37:53 |                              |
| Upper arch impression using alginate                            | Start | 11:38:41 |                              |
|                                                                 | Stop  | 11:39:47 |                              |
| Wax Bite recorded                                               | Start | 11:40:09 |                              |
|                                                                 | Stop  | 11:40:24 |                              |
| Clinical photographs taken                                      | Start | 11:41:17 |                              |
|                                                                 | Stop  | 11:42:28 |                              |

END OF TREATMENT
